1  
2  
3  
4  
5  
6  
7  
8  
9  
10  
11  
12  
13  
14  
15  
16  
17  
18  
19  
20  
21  
22  
23  
24  
25  
26  
27  
28  
29  
30  
31  
32  
33  
34  
35  
36  
37  
38  
39  
40  
41  
42  
43  
44  
45  
46  
47  
48  
49  
50  
51  
52  
53  
54  
55  
56  
57

## **A subset of UPR-induced transmembrane proteins are prematurely degraded during lipid perturbation**

Benjamin S.H. Ng, Peter Jr. Shyu, Nurulain Ho, Ruijie Chaw, Seah Yi Ling, Guillaume Thibault

School of Biological Sciences, Nanyang Technological University, Singapore, 637551

Correspondence to:

Guillaume Thibault, Tel: +65 6592 1787; Fax: +65 6791 3856; email: [thibault@ntu.edu.sg](mailto:thibault@ntu.edu.sg)

Running title: Lipid perturbation destabilises a subset of transmembrane proteins

58 **ABSTRACT**

59 **Background:** Phospholipid homeostasis in biological membranes is essential to maintain functions of  
60 organelles such as the endoplasmic reticulum. Phospholipid perturbation has been associated to non-  
61 alcoholic fatty liver disease, obesity and other metabolic disorders. However, in most cases, the  
62 biological significance of lipid disequilibrium remains unclear. Previously, we reported that  
63 *Saccharomyces cerevisiae* adapts to lipid disequilibrium by upregulating several protein quality  
64 control pathways such as the endoplasmic reticulum-associated degradation (ERAD) pathway and  
65 the unfolded protein response (UPR).

66 **Results:** Surprisingly, we observed certain ER-resident transmembrane proteins (TPs), which form  
67 part of the UPR programme, to be destabilised under lipid perturbation (LP). Among these, Sbh1 was  
68 prematurely degraded by fatty acid remodelling and membrane stiffening of the ER. Moreover, the  
69 protein translocon subunit Sbh1 is targeted for degradation through its transmembrane domain in an  
70 unconventional Doa10-dependent manner.

71 **Conclusion:** Premature removal of key ER-resident TPs might be an underlying cause of chronic ER  
72 stress in metabolic disorders.

73  
74 **Keywords:** Transmembrane protein degradation, Sbh1, phosphatidylcholine imbalance, chronic ER  
75 stress, unfolded protein response, ER protein quality control, ERAD, Doa10 complex, NAFLD, NASH.

76

77

78

79

80

81

82

83

84

85

86

87

88

89 **BACKGROUND**

90 Phospholipid homeostasis is crucial in the maintenance of various cellular processes and functions.  
91 They participate extensively in the formation of biological membranes, which serve to generate  
92 distinct intracellular environments into ordered compartments known as organelles for metabolic  
93 reactions, storage of biomolecules, signalling, as well as sequestration of metabolites. Existing as  
94 various and distinct species, phospholipids are regulated within relatively narrow limits and their  
95 composition in biological membranes among organelles differs significantly [1].

96

97 Perturbation of the two most abundant phospholipids, phosphatidylcholine (PC) and  
98 phosphatidylethanolamine (PE), can lead to various disease outcomes including non-alcoholic fatty  
99 liver disease (NAFLD) [2-5], type II diabetes (T2D) [6], as well as cardiac and muscular dystrophies  
100 [7]. Being highly abundant in biological membranes, the perturbation of PC and PE levels results in  
101 endoplasmic reticulum (ER) stress [8]. For instance, an elevated PC/PE ratio in obesity was found to  
102 contribute to the development of NAFLD [9, 10]. Perturbation in phospholipids was shown to cause  
103 the premature degradation of the sarco/endoplasmic reticulum  $\text{Ca}^{2+}$ -ATPase (SERCA) ion pump,  
104 disrupting calcium homeostasis and resulting in chronic ER stress [9]. This eventually led to hepatic  
105 steatosis and liver failure. In another study, mice fed with high fat diet exhibited an increase in gut  
106 microbiota enzymatic activity that have been shown to reduce choline [11, 12]. Choline is an essential  
107 dietary nutrient primarily metabolised in the liver and used for the synthesis of PC. Similarly, choline  
108 deficiency may play an active role in the development of insulin resistance. However, the  
109 development of chronic ER stress and metabolic diseases from lipid perturbation (LP) remains largely  
110 unknown.

111

112 In *Saccharomyces cerevisiae*, *de novo* synthesis of PC is catalysed by the enzymes Cho2 and Opi3,  
113 and similarly carried out by the homologue of Opi3, PEMT, in mammals (Fig. 1a). Cho2 first  
114 methylates PE to *N*-monomethyl phosphatidylethanolamine (MMPE), which is further methylated by  
115 Opi3 to PC through the intermediate *N,N*-dimethyl phosphatidylethanolamine (DMPE). Alternatively,  
116 PC is synthesised from choline, when available, through the Kennedy pathway. Both pathways are  
117 highly conserved from yeast to humans. It has been reported that *PEMT*<sup>-/-</sup> mice develop NAFLD within

118 three days of choline deficient diet [5]. Previously, we developed a LP yeast model to mimic NAFLD  
119 by deleting the gene *OPI3* [13].

120

121 The unfolded protein response (UPR) is a stress response pathway monitoring ER stress to restore  
122 cellular homeostasis [14]. Upon accumulation of misfolded proteins, the UPR is activated and  
123 alleviates stress by reversing severe dysfunctions through the upregulation of nearly 400 target genes  
124 in yeast [15]. Major targeted regulatory pathways includes cytosolic protein quality control (CytoQC),  
125 ER-associated degradation (ERAD), protein translocation, protein modification and phospholipid  
126 biosynthesis [15, 16]. By increasing ER protein folding capacity and enhanced clearance of misfolded  
127 proteins coupled with a general attenuation of protein translation [17], the UPR aims to achieve ER  
128 homeostasis.

129

130 Recently, it was demonstrated that the UPR is essential in alleviating ER stress in lipid dysregulated  
131 cells to maintain protein biogenesis, protein quality control and membrane integrity [13, 18-20]. LP, by  
132 the absence of *CHO2* or *OPI3*, exhibits synthetic lethality with the sole UPR signalling transducer in  
133 yeast, *IRE1*, as well as its downstream transcription factor *HAC1* [19, 20]. LP has been well  
134 characterised to induce ER stress [21-23], and the failure of the UPR to restore homeostasis is  
135 implicated in several human diseases [24-26]. This clearly establishes the critical role of the UPR in  
136 buffering the lethal effects of LP to ensure cell survival.

137

138 In this study, we observed certain ER-resident transmembrane proteins (TPs), part of the UPR  
139 programme, to be prematurely degraded under LP. First, we demonstrated that LP affects the ER  
140 membrane which results in the destabilisation of the TPs. Furthermore, we elucidated the mechanism  
141 of how one such TP, *Sbh1*, gets recognised for degradation through ERAD. Our findings reveal that  
142 under LP, *Sbh1* transmembrane degron becomes accessible to the Doa10 complex leading to its  
143 premature degradation.

144

145

146

147

148 **RESULTS**

149 **A subset of transmembrane proteins is destabilised during lipid perturbation**

150 Global transcriptional and proteomic analyses from our previous work indicated a dramatically altered  
151 biochemical landscape in yeast cells under LP [13]. Among these, 66 proteins were identified to be  
152 transcriptionally upregulated, yet displayed a decrease in protein abundance (Table S1), including 11  
153 ER-resident TPs. From these, we analysed the steady-state levels of ten TP candidates in cells under  
154 LP using the PC-deficient strain *opi3Δ* (Fig. 1a-b) [13]. Coy1, Cue1 and Erp5 exhibited similar protein  
155 steady-states in *opi3Δ* and WT, while Ctr1, Nsg2, Sbh1 and Scs7 had significantly lower steady-state  
156 levels. Surprising, Emc4, Prm5 and Yet3 showed higher steady-state protein levels. To exclude  
157 possible cellular functions affected from LP such as transport and secretion, we focused on ER-  
158 resident proteins by focusing on Cue1, Emc4, Nsg2, and Sbh1. Cue1 is an essential component of  
159 the ERAD pathway [27]. Emc4 is a member of the conserved ER transmembrane complex (EMC) and  
160 is required for efficient folding of proteins in the ER [21, 28]. The EMC is also proposed to facilitate the  
161 transfer of phosphatidylserine from the ER to mitochondria [29]. Nsg2 regulates the sterol-sensing  
162 protein Hmg2 [30]. Lastly, the  $\beta$  subunit of the Sec61 ER translocation complex, Sbh1, is highly  
163 conserved in eukaryotes and plays a role in the translocation of proteins into the ER [31-33]. Sbh1 is  
164 non-essential for translocation but leads to a defect in this process when deleted in conjunction with  
165 its paralogue, Sbh2 [34].

166

167 To assess the stability of TP candidates during LP, cycloheximide chase assay was performed in WT  
168 and *opi3Δ* strains. Half-lives of Emc4, Nsg2, and Sbh1 were found to be significantly reduced under  
169 lipid disequilibrium (Fig. 1c). No significant decrease in Cue1-HA protein level was detected in *opi3Δ*  
170 although the decrease was reproducible. One hour after attenuating protein translation, levels of  
171 Emc4, Nsg2, and Sbh1 were found to be 27%, 41%, and 58% lower in *opi3Δ*, respectively, compared  
172 to WT. This suggests that the UPR programme transcriptionally upregulates genes to restore ER  
173 homeostasis under LP, while a subset of TPs is recognised and targeted for degradation.

174

175

176

177 **A subset of ER-localised transmembrane proteins is destabilised by a decrease in**  
178 **phosphatidylcholine**

179 To ensure that Cue1, Emc4, Nsg2, and Sbh1 remain as integral ER membrane proteins during lipid  
180 perturbation, we verified their localisation at the ER (Fig. 2a) and their insertion into cellular  
181 membranes (Fig. 2b) in *opi3Δ* cells. Together, these results suggest that integration into the ER  
182 membrane is unaffected by PC depletion. To study the topology of these four proteins, we performed  
183 proteinase K (PK) digestion from isolated microsomes (Fig. 2c). In WT cells, the C-termini HA tags of  
184 Cue1-HA, Emc4-HA and Nsg2-HA are oriented towards the cytosol. Thus, the HA tag will be cleaved  
185 off if the proper topology is preserved, while the detection of a HA-bearing peptide after PK digestion  
186 indicates an inverted topology. The three proteins were found to be fully digested under LP and the  
187 predicted smaller protein fragments of 23.7, 8.53, and 5.8 kDa were not detected for Cue1-HA, Emc4-  
188 HA, and Nsg2-HA, respectively, in both WT and *opi3Δ*. Sbh1-HA is a tail-anchored protein where the  
189 C-termini HA tag is found in the ER lumen. The predicted protein fragment of 10.5 kDa after PK  
190 digestion was detected in both WT and *opi3Δ* strains, indicative of its correct membrane topology.  
191 Typically, tail-anchored proteins are tagged at the N-termini as the C-termini interacts with the Get  
192 complex for insertion into the ER membrane [35]. This result shows that, along with alkaline  
193 carbonate extraction (Fig. 2b), adding a C-terminus HA tag to Sbh1 does not interfere with its  
194 integration into the ER membrane. The four TPs were fully digested in the presence of the non-ionic  
195 detergent Nonidet P-40 (NP40). Together, these findings suggest that the four TPs are prematurely  
196 targeted for degradation once they are fully translated and integrated into the ER membrane.

197

198 To further confirm the four TPs are destabilised specifically from low PC levels, their degradation was  
199 monitored in cells grown in the presence of choline to restore PC homeostasis (Fig. 1a) [13, 36].  
200 Choline supplementation significantly stabilised Cue1-HA, Emc4-HA, Nsg2-HA, and Sbh1-HA in  
201 *opi3Δ* to the levels of WT (Fig. 3a). Subsequently, we concentrated our effort on Sbh1 to better  
202 understand how it is targeted for premature degradation during LP.

203

204 The UPR is strongly activated in response to LP [13, 21]. In *opi3Δ*, the UPR activation is constitutively  
205 elevated and unresolved, thereby referred to as chronic ER stress [13, 37]. To ensure that Sbh1 is not  
206 destabilised as a consequence of strong UPR activation, we introduced a constitutively active form of

207 the downstream effector, *HAC1<sup>i</sup>*, into WT cells [16, 38]. As expected, *HAC1<sup>i</sup>*-induced UPR activation  
208 did not further destabilise Sbh1 in WT cells (Additional file 1: Fig. S1a). Noticeably, steady-state Sbh1  
209 protein level is higher in UPR-activated WT cells as *SBH1* is upregulated from the UPR programme  
210 [13, 15]. Additionally, yeast cells can mount an intact UPR in the absence of *SBH1* (Additional file 1:  
211 Fig. S1b). Thus, this indicates that the UPR programme in *opi3Δ* is not sufficient to drive premature  
212 Sbh1 degradation.

213

#### 214 **Changes in ER membrane fluidity is sufficient to destabilise Sbh1**

215 To narrow down the specific effect of LP that might contribute to the premature degradation of Sbh1,  
216 we analysed the fatty acid (FA) composition of whole cells and fractionated microsomes. Overall,  
217 there was a general increase of cellular and microsomal (ER) saturated fatty acids (SFAs) and  
218 decrease of monosaturated fatty acids (MUFAs) in *opi3Δ* when compared to WT (Fig. 3b). A  
219 significant decrease of oleic acid (C18:1) was also observed in *opi3Δ* microsome fraction compared to  
220 that of WT. In addition to FA remodelling, the intermediate for the synthesis of PC from PE, MMPE,  
221 largely accumulates with the deletion of *OPI3* as we previously reported (Fig. 1a) [13]. A large MMPE  
222 increase is expected to induce negative membrane curvature stress as has been reported for PE [39].  
223 The remodelling of FA saturation state could be another adaptive response to alleviate membrane  
224 curvature stress in *opi3Δ* [40, 41], as FA saturation states of biological membranes are highly linked  
225 to membrane fluidity [42-44].

226

227 To better understand the impact of membrane remodelling on TPs behaviour, we monitored the  
228 dynamics of the ER-resident membrane protein Sec63-sGFP by fluorescence recovery after  
229 photobleaching (FRAP) [45]. A region of the cortical ER is photobleached and signal recovery  
230 correlates with Sec63-sGFP mobility. The recovery of Sec63-sGFP fluorescence was significantly  
231 slower in *opi3Δ* compared to WT suggesting rigidity of the ER membrane (Fig. 3c-e). This result is  
232 consistent with previous reports on the effect of decreased PC/PE ratio in stiffening membranes [40,  
233 46]. Taken together, it suggests that a decrease in membrane fluidity might prevent TPs to associate  
234 to their interacting partners following translation and resulting in premature degradation.

235

236

## 237 **Sbh1 binding to interacting partners is compromised under lipid imbalance**

238 To further characterise the effect of LP on Sbh1 stability, we performed the split-ubiquitin based  
239 membrane yeast two hybrid (MYTH) screen in WT and *opi3Δ* cells to identify changes in Sbh1  
240 membrane protein interactome [47, 48]. The reporter moiety was added at the N-terminus of Sbh1  
241 (TF-C<sub>ub</sub>-Sbh1) and did not compromise its ER localisation (Additional file 1: Fig. S2a). Strains  
242 expressing the Sbh1 bait were transformed with a yeast prey genomic plasmid library in which open  
243 reading frames are fused to sequences encoding the cognate reporter moiety [49]. A total of 49 and  
244 14 putative Sbh1-interacting proteins were identified in WT and *opi3Δ*, respectively (Additional file 1:  
245 Fig. S2b). To eliminate false positive interactors, a bait dependency test was done using the single-  
246 pass transmembrane domain of the human T-cell surface glycoprotein CD4 tagged to C<sub>ub</sub>-LexA-VP16  
247 [49]. In WT, we identified 38 bona fide Sbh1 interactors including previously reported interactors Ost4,  
248 Sec61, Spc2, Ssb1, Sss1, and Yop1 (Fig. 4a) [50-53]. Sbh1 was also found to interact with  
249 membrane proteins involved in sterol biogenesis (Erg4, Erg24 and Nsg1) and fatty acid elongation  
250 (Elo2 and Tsc13). On the other hand, only 13 proteins were found to interact with Sbh1 in *opi3Δ* cells  
251 (Fig. 4b). No interaction of Sbh1 with Sec61 and Sss1 was detected in *opi3Δ*. This suggests that  
252 Sbh1 could be dissociated from the Sec61 complex under LP, and therefore causes its premature  
253 degradation. This is consistent with the finding that Sbh2, the paralogue of Sbh1, becomes  
254 destabilised and degraded rapidly when unbound to the Sec61-like complex Ssh1 [54]. Similarly,  
255 Sbh1 was found to interact with proteins of the ERAD pathway under LP (Fig. 4b). Sbh1 interactors  
256 include the membrane-embedded ubiquitin-protein ligase Doa10 which is part of the ERAD Doa10  
257 complex [55, 56]. As the Doa10 complex is generally specific for substrates containing cytosolic  
258 lesions (ERAD-C) [57], it suggests that a polypeptide stretch of Sbh1 might become exposed on its  
259 cytosolic side under LP making it susceptible to ubiquitination. Subsequently, targeted substrates for  
260 degradation are polyubiquitylated in the cytosol by the addition of Lys-11-linked ubiquitin (Ubi4), a  
261 protein identified to interact with Sbh1 exclusively in *opi3Δ* cells. The AAA<sup>+</sup> ATPase protein Cdc48  
262 was also found to interact with Sbh1 in *opi3Δ* cells (Fig. 4b). Ubiquitylated substrates are retro-  
263 translocated to the cytosol by the action of the Cdc48 complex and targeted to the proteasome for  
264 degradation [58, 59]. Another important player of the ERAD pathway, Png1, was found to exclusively  
265 interact with Sbh1 under LP. Png1 catalyses the deglycosylation of misfolded glycoproteins, and is a  
266 critical step for ERAD substrates modification to be fit for proteasomal degradation [60]. Together, the



267 MYTH screening results suggest that a change in membrane properties lead to the dissociation of  
268 Sbh1 from the Sec61 complex, resulting in its rapid degradation through the ERAD-C complex.

269

270 To ensure levels of the Sec61 complex subunits other from Sbh1 remain unchanged under lipid  
271 perturbation, we carried out cycloheximide chase assay to follow the stability of Sec61 and Sss1-Flag.  
272 Both Sec61 and Sss1 were found to be stable in *opi3Δ* as in WT in agreement with our previous  
273 proteomic data (Fig. 4c) [13]. To assess the interaction of Sbh1 with Sec61 complex on the ER  
274 membrane under LP, native co-immunoprecipitation (co-IP) was performed (Fig. 4d). In contradiction  
275 to the MYTH screen results, Sec61 was found to interact stably with Sbh1-HA in both WT and *opi3Δ*  
276 strains. The discrepancy could be due to the difference in membrane dynamics *in vivo* and *in vitro*  
277 from the MYTH and co-IP assay, respectively.

278

279 **Sbh1 is destabilised from its transmembrane domain and degraded in a Doa10-dependent**  
280 **manner**

281 To validate that Sbh1 is degraded in a Doa10-dependent manner, we carried out cycloheximide  
282 chase assay to monitor Sbh1 stability in different ERAD mutants. Sbh1 was found to be fully stabilised  
283 in *opi3Δdoa10Δ* but not in *opi3Δhrd1Δ* and *opi3Δusa1Δ* mutants (Fig. 5a). Hrd1 and Usa1 are both  
284 part of the Hrd1 complex which recognises lesions within the luminal domains of membrane and  
285 soluble proteins (ERAD-L) and those found within transmembrane region (ERAD-M) [61]. As some  
286 misfolded proteins in the ER are routed to the vacuole for degradation, we confirmed that Sbh1  
287 degradation under LP is independent of the vacuolar pathway as shown by a similar degradation  
288 profile in *opi3Δpep4Δ*. Conversely, Sbh1 degradation showed dependency on Cue1, a conserved  
289 element in both the Doa10 and Hrd1 complexes (Additional file 1: Fig. S3). Together with the MYTH  
290 data, it suggests that Sbh1 is exclusively targeted for degradation by the ERAD Doa10 complex.

291

292 To further elucidate how Sbh1 might be targeted for degradation by the Doa10 complex during LP, we  
293 mutated Sbh1 cytosolic lysine residues to alanine separately [Sbh1(K15A,K17A), Sbh1(K23A),  
294 Sbh1(K30A,K31A), and Sbh1(K41A)] and combined [Sbh1(6KA)]. The E3 ubiquitin-protein ligase  
295 Doa10 has been extensively reported to recognise ER proteins with cytosolic lesions resulting in the  
296 transfer of ubiquitin to lysine residues [62-69]. The degradation rates of Sbh1(K15A,K17A),

297 Sbh1(K23A), Sbh1(K30A,K31A), and Sbh1(K41A) expressed in *opi3Δ* cells were similar to unmutated  
298 Sbh1 (Fig. 5b,c). Similarly, Sbh1(6KA) destabilisation was comparable to unmutated Sbh1 in *opi3Δ*  
299 strain (Fig. 5d,e). Together, these findings suggest that Sbh1 is targeted for degradation by the Doa10  
300 complex independently from the ubiquitination of its cytosolic domain. Yeast paralogue of Sbh1,  
301 Sbh2, is degraded by Doa10 through an intramembrane degron [54]. Thus, we examined the  
302 degradation of Sbh1 containing the transmembrane domain of Sbh2 in *opi3Δ* strain (Fig. 5f).  
303 Replacing the transmembrane domain of Sbh1 was sufficient to stabilise it during LP suggesting the  
304 degron recognised by Doa10 is within the lipid-embedded Sbh1  $\alpha$ -helix [54]. To further validate this  
305 finding, we used a stable Sbh2 mutant wherein the two non-conserved amino acids of the  
306 transmembrane domain of Sbh2 have been mutated from serine to proline and alanine at positions 61  
307 and 68, respectively [Sbh2(S61P,S68A)]. These two point mutations drive Sbh2 native interaction  
308 from the Ssh1 translocon to the Sec61 translocon. As previously reported, Sbh2(S61P,S68A) was  
309 stable in WT cells (Fig. 5f). Unexpectedly, Sbh2(S61P,S68A) was similarly stable in *opi3Δ* cells,  
310 suggesting the Sec61 translocon maintains its ability to interact with the non-essential  $\beta$  subunit.  
311 Together these findings suggest that the Doa10 complex recognises the Sbh1 transmembrane  
312 degron that becomes accessible during LP perhaps due to the change in the ER membrane  
313 composition.

314

315

## 316 **DISCUSISON**

317 The strong association between obesity and non-alcoholic fatty liver disease (NAFLD) in human  
318 populations is evident of the importance of lipid regulation in determining the emergence of fatty liver  
319 pathogenesis: NAFLD is now the most common cause of chronic liver enzyme elevation and  
320 cryptogenic cirrhosis, as a result of increased obesity [70, 71]. Total PC is consistently decreased in  
321 NAFLD and non-alcoholic steatohepatitis (NASH) liver samples from human patients and mouse  
322 models [8, 72, 73], and it correlates with a decrease of the enzyme required for *de novo* synthesis of  
323 PC in the liver, PEMT [9, 73]. Concurrently, chronic ER stress and the activation of the UPR are both  
324 associated with NAFLD pathologies [9, 74, 75]. Despite these connections, little is known on the effect  
325 of phospholipid perturbation on pathways of the ER. Thus, we sought to better understand how the

326 ER fails to reach homeostasis under chronic PC depletion and how the protein quality control  
327 machinery is implicated using our previously reported yeast model system [13].

328

329 The proteostasis network undergoes extensive remodelling upon PC depletion in yeast [13]. Although  
330 a large subset of proteins is increased in these stressed cells, we noticed that key proteins are rapidly  
331 degraded and are indeed sensitive to phospholipid variations. Out of the 66 proteins which displayed  
332 decreased protein abundance despite being genetically upregulated, 40% are transmembrane  
333 proteins (TPs). As 30% of the proteome is predicted to be integral or peripheral membrane proteins  
334 [52], it suggests that TPs are more sensitive to LP compared to other types of proteins. Among the  
335 identified TPs, a large proportion are ER-resident proteins suggesting this organelle is more  
336 vulnerable to the effects of LP, and that this in turn affects TP integrity in the ER. The virtual absence  
337 of sterol at the ER, a key regulator of membrane fluidity, might contribute to its susceptibility to  
338 change in the biophysical properties of the membrane through lipid variation {Zinser, 1993  
339 #871;Weete et al., 2010;Subczynski, 2017 #943}.

340

341 We sought to investigate changes in membrane properties under LP that caused the destabilisation of  
342 a subset of TPs. PC is cylindrically shaped with a cross-sectional area for the head-group similar to its  
343 constituent acyl chain tails, generating minimal curvature and forming flat lamellar phase phospholipid  
344 bilayers [76]. PE is classified as cone-shaped lipid forming non-lamellar membrane structure as it  
345 generates negative membrane curvature [39]. The phospholipid intermediate MMPE becomes highly  
346 abundant under the ablation of *OPI3*, and being mono-methylated, it has physical properties more  
347 similar to PE (Fig. 1a). The increase in membrane curvature from the replacement of PC to MMPE  
348 may induce cells to decrease their FA chain lengths in accordance to the seminal Helfrich theory of  
349 membrane bending elasticity (Fig. 3b) [41]. A more pronounced remodelling of the FA chain length in  
350 the ER over whole cell suggests either the ER is more susceptible to LP due to the minimal presence  
351 of ergosterol at the ER [77] or cells respond more aggressively to the ER membrane bilayer disruption  
352 to alleviate ER stress. Accordingly, a rise in membrane lipid packing from elevated saturated fatty  
353 acids will reduce the propensity to form curvatures.

354

355 However, the remodelling of the ER to alleviate negative membrane curvature stress, induced from  
356 high PE and MMPE levels, can impose further challenges to cells. An elevation in saturated fatty acid  
357 chains decreases ER membrane fluidity (Fig. 3b) [78] which might be partially due to the absence of  
358 the rich unsaturated fatty acid provider, PC [79, 80]. Additionally, the replacement of PC with MMPE  
359 contributes to the stiffening of the membrane [46]. Thus, these changes combined with the relatively  
360 low abundance of ergosterol at the ER membrane bilayer make this organelle particularly susceptible  
361 to PC level variations. Indeed, this change in the ER membrane led to the premature degradation of  
362 Sbh1 by the Doa10 complex through a degron within the transmembrane domain of Sbh1. The loss of  
363 Sbh1 interacting partners, during LP, might contribute to its degradation as reported for its yeast  
364 paralogue Sbh2 [54]. Dissociation of Sbh2 from the Ssh1 complex (yeast Sec61 paralogue) was  
365 proposed to sufficiently drive its Doa10-mediated degradation. Interestingly, none of the Sbh1  
366 cytosolic lysine residues are required for its degradation through the Doa10 complex suggesting Sbh1  
367 might be atypically ubiquitylated as has been reported for the Doa10 substrate Asi2 [81].

368

369 Alteration of lipid raft composition at the plasma membrane can lead to loss of protein function and  
370 rapid degradation [79, 82, 83]. The rigidity of the ER membrane, from depleting PC, may interfere with  
371 Sbh1 conformational changes necessary for its interaction with the Sec61 complex and thus result in  
372 its degradation [84]. Alternatively, the stiffening of the lipid membrane may reduce Sbh1 diffusion  
373 through the lipid bilayer leading to sustained interaction with the Doa10 complex (Fig. 4 and 6) [54,  
374 85]. Thus, a decrease in PC clearly targets Sbh1 for degradation from a change in the biophysical  
375 property of the membrane. It remains to be determined if the LP-induced degradation mechanism of  
376 Sbh1 applies to the other destabilized TPs that have been identified (Fig. 1b). Additionally, the  
377 absence of PC with its large head-group and the abnormally high presence of PE and MMPE with  
378 smaller head-groups at the lipid membrane-cytosol interface should result in Doa10 accessibility of  
379 the Sbh1  $\alpha$ -helix degron [54].

380

381 The coordinated upregulation of the proteostasis network by the UPR serves as an important stress  
382 recovery mechanism that helps cells cope with the otherwise lethal effects of LP [13]. Despite this  
383 robust stress response under LP, the UPR programme fails to increase the expression level of a  
384 subset of TPs. The premature degradation of these TPs can prevent an effective proteostatic

385 response especially under prolonged LP (Fig. 6). ER stress induced from a temporary lipid  
386 perturbation will result in the upregulation of UPR target genes and consequently ER homeostasis.  
387 However, in the context of fatty liver, prolonged LP might prevent cells from reaching ER homeostasis  
388 by the premature degradation of key UPR target TPs. Therefore, this will lead to chronic ER stress  
389 which might contribute to the progression of NAFLD. In addition, the prolonged upregulation of  
390 lipogenic transcription factors from the UPR programme may also contribute to liver progression into  
391 hepatosteatosis [86].

392

393 In contrast, disrupting phospholipid homeostasis may be exploited to target pathogens. An increase in  
394 phospholipid synthesis is essential for replication of the parasite *Plasmodium falciparum* during the  
395 erythrocytic stage [87]. Phospholipid content of parasite-infected erythrocytes dramatically increases  
396 during maturation with 85% of newly synthesised phospholipids being PC and PE for growth and cell  
397 division [88]. Hence, the inhibition of phospholipid synthesis might be an effective strategy for  
398 antimalarial drugs [87, 89]. In addition, *P. falciparum* resistance to artemisinin-based combination  
399 therapies (ACTs) is associated to ER stress where the UPR mitigates artemisinin-induced protein  
400 damage [90]. Thus, targeting phospholipid biosynthesis in combination with artemisinin might be an  
401 efficient strategy to overcome resistance by preventing effective UPR activation in *P. falciparum*. [91].  
402 Similarly, it may be applied to therapeutic strategies against diseases such as cancer where UPR  
403 activation is a potent driver of cell division [24, 92].

404

405

## 406 **CONCLUSIONS**

407 Here, we report that a subset of transmembrane proteins, part of the UPR programme, are  
408 prematurely degraded under LP. ER-resident proteins Cue1, Emc4, Nsg2, and Sbh1 topology and  
409 integration into the ER are not affected by LP while they are prematurely degraded. By further  
410 investigating the  $\beta$  subunit of Sec61 ER translocation complex, Sbh1, we proposed that it is  
411 prematurely degraded by the Doa10 complex through the recognition of a specific transmembrane  
412 degron. The proper association of Sbh1 with its interacting partners as well as the maintenance of  
413 membrane lipid PC level should be sufficient to prevent the Sbh1 degron from being recognised by  
414 the Doa10 complex during lipid equilibrium. However, the drastic decrease of PC associated with fatty

415 liver promotes the dissociation of Sbh1 from its interacting partners as well as the exposure of Sbh1  
416 proline 54 leading to its premature degradation in a Doa10-dependent manner. Thus, the premature  
417 degradation of a subset of ER-resident TPs during prolonged lipid perturbation might contribute to  
418 chronic ER stress associated with NAFLD and NASH.

419

420

## 421 **METHODS**

### 422 **Statistics**

423 Error bars indicate standard error of the mean (SEM), calculated from at least three biological  
424 replicates, unless otherwise indicated. *P* values were calculated using two-tailed Student's *t* test,  
425 unless otherwise indicated, and reported as *P*=value in figures.

426

### 427 **Strains and antibodies**

428 *Saccharomyces cerevisiae* strains used in this study are listed in Additional file 1: Table S2. Strains  
429 were generated using standard cloning protocols. Anti-Kar2 polyclonal rabbit antibody and anti-Sec61  
430 polyclonal rabbit antibody were gifts from Davis Ng (Temasek Life Sciences Laboratories, Singapore).  
431 Anti-HA mouse monoclonal antibody HA.11 (Covance, Princeton, NJ), anti-Pgk1 mouse monoclonal  
432 antibody (Invitrogen), anti-GFP mouse monoclonal antibody (Sigma-Aldrich, St. Louis, MO) anti-  
433 tubulin mouse monoclonal antibody 12G10 (DHSB) and anti-LexA polyclonal rabbit antibody (Abcam,  
434 Cambridge, United Kingdom) were commercially purchased. Secondary antibodies goat anti-mouse  
435 IgG-DyLight 488 (Thermo Fisher, Waltham, MA), goat anti-rabbit IgG-DyLight 550 (Thermo Fisher,  
436 Waltham, MA), goat anti-mouse IgG-HRP (Santa Cruz Biotechnology, Dallas, TX), goat anti-rabbit  
437 IgG-HRP (Santa Cruz Biotechnology, Dallas, TX), goat anti-mouse IgG-IRDye 800 (LI-COR  
438 Biosciences) and goat anti-rabbit IgG-IRDye 680 (LI-COR Biosciences, Lincoln, NE) were  
439 commercially purchased.

440

### 441 **Plasmids used in this study**

442 Plasmids and primers used in this study are listed in Additional file 1: Table S3 and S4, respectively.  
443 Plasmids were constructed using standard cloning protocols. All coding sequences of constructs used  
444 in this study were sequenced in their entirety. The plasmid pJC835 containing *HAC1<sup>i</sup>* gene in pRS316

445 was previously described [14]. The plasmids pGT0179, pGT0181, pGT0183, and pGT0185, were  
446 generated by amplifying the promoter and open reading frame of *NSG2*, *CUE1*, *SBH1*, and *EMC4*  
447 with primer pairs BN033-034, BN029-030, BN035-036, and BN031-032, respectively, from the  
448 template WT genomic DNA (gDNA). PCR products of *NSG2*, *SBH1*, and *EMC4* were digested with  
449 the restriction enzymes *NotI* and *NcoI* before being ligated into the corresponding restriction sites in  
450 pRS315. *CUE1* PCR product was digested with the restriction enzymes *NcoI* and *PstI* before being  
451 ligated into the corresponding restriction sites in pRS315. The plasmid pGT0288 was generated by  
452 amplifying the open reading frame of *Sbh1* with primer BN027 and BN028 from WT gDNA and  
453 digested with the restriction enzyme *SfiI* before being ligated into the corresponding restriction sites in  
454 pBT3N. The plasmid pGT0350 was generated by Gibson assembly to join the promoter and open  
455 reading frame of *SSS1* with primers BN013 and BN014 from WT gDNA with a 3X FLAG tag amplified  
456 with primers BN015 and BN016 from pGT0284 into pRS313. Plasmids pGT0352, pGT0445,  
457 pGT0446, and pGT0447 were generated by performing site-directed mutagenesis on pGT0183 with  
458 primer pairs BN037-BN038, PS153-PS154, PS141-142, and PS143-144, respectively, as previously  
459 described [93]. The plasmid pGT0459 was generated by sequential site-directed mutagenesis from  
460 pGT0352 using primer pairs PS143-PS144, PS141-PS142, and PS139-140 as previously described  
461 [93].

462

### 463 **Cycloheximide chase assay**

464 Cycloheximide chase assay was carried out as previously described [94]. Typically, 6 OD<sub>600</sub> units of  
465 early log phase cells were grown in synthetic media. Protein synthesis was inhibited by adding 200  
466 µg/ml cycloheximide. Samples were taken at designated time points. Cell lysates from these samples  
467 were resolved by SDS-PAGE and transferred onto a nitrocellulose membrane. Immunoblotting was  
468 performed with appropriate primary antibodies and horseradish peroxidase-conjugated secondary  
469 antibodies or IRDye-conjugated secondary antibodies. Proteins were visualised using the ECL system  
470 (C-DiGit Chemiluminescent Western Blot Scanner) or the NIR fluorescence system (Odyssey CLx  
471 Imaging System). Values for each time point were normalised using anti-Pgk1 or anti-Tub1 as loading  
472 controls. Quantification was performed using an Odyssey infrared imaging program (LI-COR  
473 Biosciences, Lincoln, NE).

474

475 **Indirect immunofluorescence**

476 Indirect immunofluorescence was carried out as previously described [95]. Typically, cells were grown  
477 to early log phase at 30°C in selective synthetic complete media, fixed in 3.7% formaldehyde and  
478 permeabilised. After blocking with 3% BSA, staining was performed using anti-HA (1:200), anti-LexA  
479 (1:500), anti-GFP (1:200) or anti-Kar2p primary antibody (1:1,000) followed by Alexa Fluor 488 goat  
480 anti-mouse secondary antibody (1:1,000) and goat anti-rabbit IgG-DyLight 550 (Thermo Fisher,  
481 Waltham, MA). Samples were visualised using a Zeiss LSM 710 microscope with a 100x 1.4 NA oil  
482 Plan-Apochromat objective (Carl Zeiss MicroImaging).

483

484 **Alkaline carbonate extraction**

485 Alkaline carbonate extraction was carried out as previously described [96]. Five OD<sub>600</sub> units of early  
486 log phase cells were resuspended in 1.2 ml of 10 mM sodium phosphate pH 7.0, 1mM PMSF and  
487 protease inhibitor cocktail (PIC). An equal volume of 0.2 M sodium carbonate (pH 11.0) was added to  
488 cell lysates incubated 30 min at 4°C and spun down at 100,000 x *g* for 30 min, 4°C. The pellet  
489 (membrane fraction) was solubilised in 3% SDS, 100 mM Tris, pH 7.4, 3 mM DTT and incubated at  
490 100°C for 10 min. Proteins from total cell lysate and supernatant fractions (collected from centrifuged  
491 lysate) were precipitated with 10% trichloroacetic acid (TCA) and spun down 30 min at 18,400 x *g*,  
492 4°C. Proteins were resuspended in TCA resuspension buffer (100 mM Tris-HCL pH 11.0, 3% SDS).

493

494 **Proteinase K digestion assay**

495 Fifty OD<sub>600</sub> units of early log phase cells were pelleted and resuspended in 1 ml Tris Buffer (50 mM  
496 Tris pH 7.4, 50 mM NaCl, 10% glycerol, 1mM PMSF and PIC). The clarified cell lysate was spun  
497 down at 100,000 x *g* for 1 h at 4 °C. The pellet was resuspended and washed with 0.5 ml Tris Buffer  
498 without PMSF and PIC. Around ~ 5 OD<sub>600</sub> equivalent of microsomes were incubated with 1 mg/ml  
499 Proteinase K (Promega, Fitchburg, WI) and 1% Nonidet P40 substitute (Sigma-Aldrich, St. Louis, MO)  
500 when indicated and incubated at 37°C for 30 min. To quench the reaction, 5 mM PMSF was added  
501 followed by TCA precipitation. Samples were resolved by SDS-PAGE and transferred onto a  
502 nitrocellulose membrane. Immunodetection was performed with appropriate primary antibodies and  
503 IRDye-conjugated secondary antibodies. Immunoreactive species were visualised using the NIR  
504 fluorescence system (Odyssey CLx Imaging System).



505

506 **Lipid extraction and fatty acid analysis**

507 For whole cells, 10 OD<sub>600</sub> of early log phase cells were pelleted, washed and resuspended with ice-  
508 cold water and lyophilised using Virtis Freeze Dryer under vacuum. For lipid extraction for  
509 microsomes, 50 OD<sub>600</sub> of early log phase cells were pelleted, washed with phosphate-buffered saline  
510 (PBS) and resuspended in 1 ml of Tris Buffer (50 mM Tris-HCL, 150 mM NaCl, 5 mM EDTA pH 8.0,  
511 167 µM PMSF and PIC). The clarified lysate was spun down at 100,000 x *g* for 1 h at 4°C. The pellet  
512 was resuspended in 100 µl ddH<sub>2</sub>O and sonicated for 30 min. Lipid content was normalised to protein  
513 content using bicinchoninic acid (BCA) protein assay (Sigma-Aldrich, St. Louis, MO). Normalised  
514 microsome contents were resuspended with ice-cold ddH<sub>2</sub>O and lyophilised using Virtis Freeze Dryer  
515 under vacuum. Lyophilised samples were subjected to 300 µl 1.25 M HCl-MeOH (Sigma-Aldrich, St.  
516 Louis, MO) and incubated at 80°C for 1 h to hydrolyse and esterify FAs into FA methyl esters (FAME).  
517 FAMEs were extracted three times with 1 ml of hexane and separated on a gas chromatography with  
518 flame ionization detector (GC-FID; GC-2014; Shimadzu, Kyoto, Japan) equipped with an Ulbon HR-  
519 SS-10 capillary column (nitrile silicone, 25 m x 0.25 mm; Shinwa Chemical Industries, Kyoto, Japan).  
520 The temperature was held 3 min at 160°C and increase to 180°C with 1.5°C/min increments and to  
521 220°C with 4°C/min increments.

522

523 **Fluorescence recovery after photobleaching**

524 Fluorescence recovery after photobleaching (FRAP) was carried out as previously described [45].  
525 Typically, early log phase cells expressing Sec63-sGFP were fixed on coverslips in Attofluor cell  
526 chambers (Thermo Fisher, Waltham, MA) with concanavalin A before rinsing thrice with ddH<sub>2</sub>O. Cells  
527 were imaged for 5 s followed by photobleaching a region of interest of 82 x 82 pixels at 100% intensity  
528 488 nm laser under 5 x magnification. Subsequently, images were taken at 1.57 s intervals for a total  
529 of 160 sec. Images were acquired using a Zeiss LSM 710 microscope with a 100x 1.4 NA oil Plan-  
530 Apochromat objective (Carl Zeiss MicroImaging) with argon laser line 488 nm of optical slices 4.2 µm.  
531 ZEN black edition was used for image acquisition and analysis. Magnification, laser power, and  
532 detector gains were identical across samples. For data analysis, the fluorescence intensities of three  
533 regions of interest were measured for the duration of the experiment: the region of interest (ROI), a  
534 region outside of the cell to measure the overall background fluorescence (BG), and a non-

535 photobleached region within the cell was monitored to measure the overall photobleaching and  
536 fluorescence variation (REF). Normalised fluorescence intensity [ $F(t)_{norm}$ ] was calculated for each time  
537 point using Eq. 1 [97].  $F(i)$  denotes the initial fluorescence intensities.

$$538 \quad F(t)_{norm} = \frac{F(t)_{ROI} - F_{BG}}{F(t)_{REF} - F_{BG}} \times \frac{F(i)_{REF} - F_{BG}}{F(i)_{ROI} - F_{BG}} \quad (1)$$

539

540 Fluorescent recovery was analysed by calculating half maximal fluorescence intensity ( $t_{1/2}$ ) using Eq. 2  
541 [98].  $F_0$  denotes the normalised initial fluorescence intensity,  $F_\infty$  the normalised maximum  
542 fluorescence intensity and  $F(t)$  the normalised fluorescent intensity at each time point.

$$543 \quad F(t) = \frac{F_0 + F_\infty \frac{t}{t_{1/2}}}{1 + \frac{t}{t_{1/2}}} \quad (2)$$

544 The  $t_{1/2}$  values were plotted using GraphPad Prism 5.0.

545

#### 546 **Membrane yeast two-hybrid system assay**

547 Membrane yeast two-hybrid (MYTH) assay was carried out as previously described [47]. Yeast two-  
548 hybrid screen uses the split ubiquitin two hybrid (N-terminus,  $N_{ub}$  and C-terminus,  $C_{ub}$ ). Briefly, MYTH  
549 bait was generated by integrating  $C_{ub}$ -LexA-VP16 tag at the N-terminus of Sbh1 under the control of  
550 the promoter *CYC1* and transformed into the NMY51 yeast strain. Sbh1 tagged protein localization  
551 was verified by indirect immunofluorescence using anti-LexA antibodies against the tag described  
552 above. Seven micrograms of  $N_{ub}$ G-X cDNA prey library (Dualsystems) was transformed in 35 OD<sub>600</sub>  
553 units of *SBH1* reporter cells. Interactors were isolated on selective complete (SC) media lacking  
554 tryptophan, leucine, adenine and histidine complemented with 80 µg/mL X-Gal and 5 mM 3-Amino-  
555 1,2,4-triazole (3-AT) and grown for two days at 30°C. The histidine inhibitor 3-AT was used to reduce  
556 false positive colonies. Only colonies which display robust growth on selective media and a blue  
557 colour were selected for further analysis. The prey cDNA plasmids were isolated and sequenced. The  
558 list of interactors was verified via the bait dependency test, wherein all identified interactors are  
559 retransformed back into the original bait strain, together with a negative control using the single-pass  
560 transmembrane domain of human T-cell surface glycoprotein CD4 tagged to  $C_{ub}$ -LexA-VP16 MYTH  
561 [49]. Interactors that activate the reporter system in yeast carrying the negative control bait were

562 removed from the list of interactors. Yeast that harbour the prey and the bait-of-interest and did not  
563 grow were likewise removed from the list of interactors.

564

### 565 **Co-immunoprecipitation**

566 Native lysis protocol was carried out as previously described [99]. Briefly, 40 OD<sub>600</sub> units of  
567 exponentially growing early log phase cells were harvested and resuspended in 1 ml native lysis  
568 buffer (50 mM Tris, pH 7.5, 150 mM NaCl, 5 mM EDTA, 1 mM PIC and 1 mM PMSF). Microsomes  
569 were spun down from the clear lysates at 200,000 X g for 30 min, 4°C. The pellet was solubilised in  
570 native lysis buffer with 1% digitonin (Calbiochem) overnight at 4°C. The resulting lysate was cleared  
571 by centrifugation at 16,000 X g for 10 min, 4°C prior to immunoprecipitation. Solubilised microsomes  
572 were incubated with Protein G beads and anti-HA antibodies overnight at 4°C. Beads were washed  
573 thrice lysis buffer containing 0.5% digitonin and twice with TBS. Proteins were separated using SDS-  
574 PAGE and visualised by immunoblotting as described above.

575

### 576 **β-galactosidase reporter assay**

577 The β-galactosidase reporter assay was carried out as previously described [16]. Typically, four OD<sub>600</sub>  
578 units of early log phase cells were collected and resuspended in 75 µl LacZ buffer (125 mM sodium  
579 phosphate, pH 7, 10 mM KCl, 1 mM MgSO<sub>4</sub>, 50 mM β-mercaptoethanol). As positive control to induce  
580 the UPR, tunicamycin was added at a concentration of 2.5 µg/ml to growing WT cells 1h prior to  
581 harvest. An aliquot of 25 µl cell resuspension was transferred into 975 µl ddH<sub>2</sub>O and the absorbance  
582 was measured at 600 nm. To the remaining resuspension, 50 µl chloroform and 20 µl 0.1% SDS were  
583 added and vortexed vigorously for 20 sec. The reaction was started with the addition of 1.4 mg/ml  
584 ONPG (2-nitrophenyl -D-galactopyranoside; Sigma) in LacZ buffer. Then, the reaction was quenched  
585 with 500 µl of 1 M Na<sub>2</sub>CO<sub>3</sub> when sufficient yellow colour had developed without exceeding a ten-  
586 minute reaction. The absorbance was measured at 420 and 550 nm. The β-galactosidase activity was  
587 calculated using Eq. (3).

588

$$\text{Miller units} = 1000 \times (\text{OD}_{420} - 1.75 \times \text{OD}_{550}) / (t \times (\text{VA}/\text{VR}) \times \text{OD}_{600}) \quad (3)$$

589 The values were then normalised to the activity of WT.

590

591

592 **LIST OF ABBREVIATIONS**

593 co-IP, co-immunoprecipitation; CytoQC, cytosolic protein quality control; DMPE, N-dimethyl  
594 phosphatidylethanolamine; ER, endoplasmic reticulum, ERAD, endoplasmic reticulum-associated  
595 degradation; FA, fatty acid; LP, lipid perturbation; MMPE, N-monomethyl phosphatidylethanolamine;  
596 MYTH, membrane yeast two hybrid; NAFLD, non-alcoholic fatty liver disease; NASH, non-alcoholic  
597 steatohepatitis; PC, phosphatidylcholine; PE, phosphatidylethanolamine; SERCA, sarco/endoplasmic  
598 reticulum Ca<sup>2+</sup>-ATPase; T2D, type II diabetes; TP, transmembrane protein; UPR, unfolded protein  
599 response.

600

601

602 **DECLARATIONS**

603 **Ethics approval and consent to participate**

604 Not applicable

605

606 **Consent for publication**

607 Not applicable

608

609 **Availability of data and material**

610 All data generated and/or analysed from this study are included in this manuscript and its additional  
611 information files

612

613 **Competing interests**

614 The authors declare that they have no competing interests.

615

616 **Funding**

617 This work was supported by the Nanyang Assistant Professorship program from Nanyang  
618 Technological University and the Nanyang Technological University Research Scholarship to B. S.H.  
619 N. and P.J.S. (predoctoral fellowship).

620

621

622 **Authors' contributions**

623 BSHN, PJS, and GT designed the experiments. BSHN and PJS performed the experiments with the  
624 contribution of NH, RC, and SYL. BSHN performed the experiments related to Fig. 1-3; 4a-c; 5a; S1-  
625 S3. PJS performed the experiments related to Fig. 3c-e; Fig. 4a-b; Fig. 5b-e, S2. NH performed the  
626 experiments related to Fig. 4d. RC performed the experiments related to Fig. 4a-c, SYL performed the  
627 experiments related to Fig. 4a-b. BSHN, PJS, NH, and GT contributed to the writing of the manuscript  
628 and the interpretation of the data. All authors read and approved the final manuscript.

629

630 **Acknowledgements**

631 We are grateful to Dr. Davis Ng for providing reagents. We thank Dr. Stefan Kreft for generously  
632 providing the plasmids STK05-8-5 and STK05-5-9 [54], Yee Lin Ang and Charlie Marvalim for  
633 assisting in cloning. We thank Chengchao Xu and members of Thibault lab for critical reading of the  
634 manuscript.

635

636

637

638

639

640

641

642

643

644

645

646

647

648

649

650

651

652 **REFERENCES**

- 653 1. van Meer G, Voelker DR, Feigenson GW: **Membrane lipids: where they are and how they**  
654 **behave.** *Nat Rev Mol Cell Biol* 2008, **9**(2):112-124.
- 655 2. Arendt BM, Ma DW, Simons B, Noureldin SA, Therapondos G, Guindi M, Sherman M, Allard  
656 **JP: Nonalcoholic fatty liver disease is associated with lower hepatic and erythrocyte**  
657 **ratios of phosphatidylcholine to phosphatidylethanolamine.** *Applied physiology, nutrition,*  
658 *and metabolism = Physiologie appliquee, nutrition et metabolisme* 2013, **38**(3):334-340.
- 659 3. Buang Y, Wang YM, Cha JY, Nagao K, Yanagita T: **Dietary phosphatidylcholine alleviates**  
660 **fatty liver induced by orotic acid.** *Nutrition* 2005, **21**(7-8):867-873.
- 661 4. Corbin KD, Zeisel SH: **Choline metabolism provides novel insights into nonalcoholic**  
662 **fatty liver disease and its progression.** *Current opinion in gastroenterology* 2012,  
663 **28**(2):159-165.
- 664 5. Li Z, Agellon LB, Allen TM, Umeda M, Jewell L, Mason A, Vance DE: **The ratio of**  
665 **phosphatidylcholine to phosphatidylethanolamine influences membrane integrity and**  
666 **steatohepatitis.** *Cell metabolism* 2006, **3**(5):321-331.
- 667 6. Kim YJ, Lee HS, Kim YK, Park S, Kim JM, Yun JH, Yu HY, Kim BJ: **Association of**  
668 **Metabolites with Obesity and Type 2 Diabetes Based on FTO Genotype.** *PloS one* 2016,  
669 **11**(6):e0156612.
- 670 7. Mitsuhashi S, Nishino I: **Phospholipid synthetic defect and mitophagy in muscle disease.**  
671 *Autophagy* 2011, **7**(12):1559-1561.
- 672 8. Vance DE: **Phospholipid methylation in mammals: from biochemistry to physiological**  
673 **function.** *Biochimica et biophysica acta* 2014, **1838**(6):1477-1487.
- 674 9. Fu S, Yang L, Li P, Hofmann O, Dicker L, Hide W, Lin X, Watkins SM, Ivanov AR, Hotamisligil  
675 **GS: Aberrant lipid metabolism disrupts calcium homeostasis causing liver**  
676 **endoplasmic reticulum stress in obesity.** *Nature* 2011, **473**(7348):528-531.
- 677 10. Jacobs RL, Zhao Y, Koonen DP, Sletten T, Su B, Lingrell S, Cao G, Peake DA, Kuo MS,  
678 Proctor SD *et al*: **Impaired de novo choline synthesis explains why**  
679 **phosphatidylethanolamine N-methyltransferase-deficient mice are protected from diet-**  
680 **induced obesity.** *The Journal of biological chemistry* 2010, **285**(29):22403-22413.

- 681 11. Dumas ME, Barton RH, Toye A, Cloarec O, Blancher C, Rothwell A, Fearnside J, Tatoud R,  
682 Blanc V, Lindon JC *et al*: **Metabolic profiling reveals a contribution of gut microbiota to**  
683 **fatty liver phenotype in insulin-resistant mice.** *Proceedings of the National Academy of*  
684 *Sciences of the United States of America* 2006, **103**(33):12511-12516.
- 685 12. Nicholson JK, Holmes E, Kinross J, Burcelin R, Gibson G, Jia W, Pettersson S: **Host-gut**  
686 **microbiota metabolic interactions.** *Science* 2012, **336**(6086):1262-1267.
- 687 13. Thibault G, Shui G, Kim W, McAlister GC, Ismail N, Gygi SP, Wenk MR, Ng DT: **The**  
688 **membrane stress response buffers lethal effects of lipid disequilibrium by**  
689 **reprogramming the protein homeostasis network.** *Mol Cell* 2012, **48**(1):16-27.
- 690 14. Cox JS, Shamu CE, Walter P: **Transcriptional Induction of Genes Encoding**  
691 **Endoplasmic-Reticulum Resident Proteins Requires a Transmembrane Protein-Kinase.**  
692 *Cell* 1993, **73**(6):1197-1206.
- 693 15. Travers KJ, Patil CK, Wodicka L, Lockhart DJ, Weissman JS, Walter P: **Functional and**  
694 **genomic analyses reveal an essential coordination between the unfolded protein**  
695 **response and ER-associated degradation.** *Cell* 2000, **101**(3):249-258.
- 696 16. Thibault G, Ismail N, Ng DT: **The unfolded protein response supports cellular robustness**  
697 **as a broad-spectrum compensatory pathway.** *Proceedings of the National Academy of*  
698 *Sciences of the United States of America* 2011, **108**(51):20597-20602.
- 699 17. Harding HP, Zhang Y, Ron D: **Protein translation and folding are coupled by an**  
700 **endoplasmic-reticulum-resident kinase.** *Nature* 1999, **397**(6716):271-274.
- 701 18. Volmer R, Ron D: **Lipid-dependent regulation of the unfolded protein response.** *Current*  
702 *opinion in cell biology* 2015, **33**:67-73.
- 703 19. Costanzo M, Baryshnikova A, Bellay J, Kim Y, Spear ED, Sevier CS, Ding H, Koh JL, Toufighi  
704 K, Mostafavi S *et al*: **The genetic landscape of a cell.** *Science* 2010, **327**(5964):425-431.
- 705 20. Schuldiner M, Collins SR, Thompson NJ, Denic V, Bhamidipati A, Punna T, Ihmels J,  
706 Andrews B, Boone C, Greenblatt JF *et al*: **Exploration of the function and organization of**  
707 **the yeast early secretory pathway through an epistatic miniarray profile.** *Cell* 2005,  
708 **123**(3):507-519.

- 709 21. Jonikas MC, Collins SR, Denic V, Oh E, Quan EM, Schmid V, Weibezahn J, Schwappach B,  
710 Walter P, Weissman JS *et al.* **Comprehensive characterization of genes required for**  
711 **protein folding in the endoplasmic reticulum.** *Science* 2009, **323**(5922):1693-1697.
- 712 22. Promlek T, Ishiwata-Kimata Y, Shido M, Sakuramoto M, Kohno K, Kimata Y: **Membrane**  
713 **aberrancy and unfolded proteins activate the endoplasmic reticulum stress sensor Ire1**  
714 **in different ways.** *Molecular biology of the cell* 2011, **22**(18):3520-3532.
- 715 23. Volmer R, van der Ploeg K, Ron D: **Membrane lipid saturation activates endoplasmic**  
716 **reticulum unfolded protein response transducers through their transmembrane**  
717 **domains.** *Proceedings of the National Academy of Sciences of the United States of America*  
718 2013, **110**(12):4628-4633.
- 719 24. Wu H, Ng BS, Thibault G: **Endoplasmic reticulum stress response in yeast and humans.**  
720 *Biosci Rep* 2014, **34**(4).
- 721 25. Yang L, Zhao D, Ren J, Yang J: **Endoplasmic reticulum stress and protein quality control**  
722 **in diabetic cardiomyopathy.** *Biochimica et biophysica acta* 2015, **1852**(2):209-218.
- 723 26. Pagliassotti MJ: **Endoplasmic reticulum stress in nonalcoholic fatty liver disease.** *Annu*  
724 *Rev Nutr* 2012, **32**:17-33.
- 725 27. Biederer T, Volkwein C, Sommer T: **Role of Cue1p in ubiquitination and degradation at**  
726 **the ER surface.** *Science* 1997, **278**(5344):1806-1809.
- 727 28. Shurtleff MJ, Itzhak DN, Hussmann JA, Schirle Oakdale NT, Costa EA, Jonikas M,  
728 Weibezahn J, Popova KD, Jan CH, Sinitcyn P *et al.* **The ER membrane protein complex**  
729 **interacts cotranslationally to enable biogenesis of multipass membrane proteins.** *Elife*  
730 2018, **7**.
- 731 29. Lahiri S, Chao JT, Tavassoli S, Wong AK, Choudhary V, Young BP, Loewen CJ, Prinz WA: **A**  
732 **conserved endoplasmic reticulum membrane protein complex (EMC) facilitates**  
733 **phospholipid transfer from the ER to mitochondria.** *PLoS Biol* 2014, **12**(10):e1001969.
- 734 30. Flury I, Garza R, Shearer A, Rosen J, Cronin S, Hampton RY: **INSIG: a broadly conserved**  
735 **transmembrane chaperone for sterol-sensing domain proteins.** *The EMBO journal* 2005,  
736 **24**(22):3917-3926.
- 737 31. Shao S, Hegde RS: **Membrane protein insertion at the endoplasmic reticulum.** *Annu Rev*  
738 *Cell Dev Biol* 2011, **27**:25-56.



- 739 32. Park E, Rapoport TA: **Mechanisms of Sec61/SecY-mediated protein translocation across**  
740 **membranes.** *Annu Rev Biophys* 2012, **41**:21-40.
- 741 33. Mandon EC, Trueman SF, Gilmore R: **Protein translocation across the rough**  
742 **endoplasmic reticulum.** *Cold Spring Harb Perspect Biol* 2013, **5**(2).
- 743 34. Feng D, Zhao X, Soromani C, Toikkanen J, Romisch K, Vembar SS, Brodsky JL, Keranen S,  
744 Jantti J: **The transmembrane domain is sufficient for Sbh1p function, its association**  
745 **with the Sec61 complex, and interaction with Rtn1p.** *The Journal of biological chemistry*  
746 2007, **282**(42):30618-30628.
- 747 35. Wang F, Whynot A, Tung M, Denic V: **The mechanism of tail-anchored protein insertion**  
748 **into the ER membrane.** *Mol Cell* 2011, **43**(5):738-750.
- 749 36. Carman GM, Henry SA: **Phospholipid biosynthesis in yeast.** *Annual review of biochemistry*  
750 1989, **58**:635-669.
- 751 37. Vevea JD, Garcia EJ, Chan RB, Zhou B, Schultz M, Di Paolo G, McCaffery JM, Pon LA: **Role**  
752 **for Lipid Droplet Biogenesis and Microlipophagy in Adaptation to Lipid Imbalance in**  
753 **Yeast.** *Dev Cell* 2015, **35**(5):584-599.
- 754 38. Chapman RE, Walter P: **Translational attenuation mediated by an mRNA intron.** *Curr Biol*  
755 1997, **7**(11):850-859.
- 756 39. Vance JE, Tasseva G: **Formation and function of phosphatidylserine and**  
757 **phosphatidylethanolamine in mammalian cells.** *Biochimica et biophysica acta* 2013,  
758 **1831**(3):543-554.
- 759 40. Boumann HA, Gubbens J, Koorengel MC, Oh CS, Martin CE, Heck AJ, Patton-Vogt J,  
760 Henry SA, de Kruijff B, de Kroon AI: **Depletion of phosphatidylcholine in yeast induces**  
761 **shortening and increased saturation of the lipid acyl chains: evidence for regulation of**  
762 **intrinsic membrane curvature in a eukaryote.** *Molecular biology of the cell* 2006,  
763 **17**(2):1006-1017.
- 764 41. Zimmerberg J, Kozlov MM: **How proteins produce cellular membrane curvature.** *Nat Rev*  
765 *Mol Cell Bio* 2006, **7**(1):9-19.
- 766 42. Quinn PJ: **The fluidity of cell membranes and its regulation.** *Progress in biophysics and*  
767 *molecular biology* 1981, **38**(1):1-104.

- 768 43. Stubbs CD: **Membrane fluidity: structure and dynamics of membrane lipids.** *Essays in*  
769 *biochemistry* 1983, **19**:1-39.
- 770 44. Stubbs CD, Smith AD: **The modification of mammalian membrane polyunsaturated fatty**  
771 **acid composition in relation to membrane fluidity and function.** *Biochimica et biophysica*  
772 *acta* 1984, **779**(1):89-137.
- 773 45. Shibata Y, Voss C, Rist JM, Hu J, Rapoport TA, Prinz WA, Voeltz GK: **The reticulon and**  
774 **DP1/Yop1p proteins form immobile oligomers in the tubular endoplasmic reticulum.**  
775 *The Journal of biological chemistry* 2008, **283**(27):18892-18904.
- 776 46. Dawaliby R, Trubbia C, Delporte C, Noyon C, Ruyschaert JM, Van Antwerpen P, Govaerts  
777 C: **Phosphatidylethanolamine Is a Key Regulator of Membrane Fluidity in Eukaryotic**  
778 **Cells.** *Journal of Biological Chemistry* 2016, **291**(7):3658-3667.
- 779 47. Snider J, Kittanakom S, Damjanovic D, Curak J, Wong V, Stagljar I: **Detecting interactions**  
780 **with membrane proteins using a membrane two-hybrid assay in yeast.** *Nat Protoc* 2010,  
781 **5**(7):1281-1293.
- 782 48. Paumi CM, Menendez J, Arnoldo A, Engels K, Iyer KR, Thaminy S, Georgiev O, Barral Y,  
783 Michaelis S, Stagljar I: **Mapping protein-protein interactions for the yeast ABC**  
784 **transporter Ycf1p by integrated split-ubiquitin membrane yeast two-hybrid analysis.**  
785 *Mol Cell* 2007, **26**(1):15-25.
- 786 49. Snider J, Kittanakom S, Curak J, Stagljar I: **Split-ubiquitin based membrane yeast two-**  
787 **hybrid (MYTH) system: a powerful tool for identifying protein-protein interactions.**  
788 *Journal of visualized experiments : JoVE* 2010(36).
- 789 50. Chavan M, Yan A, Lennarz WJ: **Subunits of the translocon interact with components of**  
790 **the oligosaccharyl transferase complex.** *The Journal of biological chemistry* 2005,  
791 **280**(24):22917-22924.
- 792 51. Panzner S, Dreier L, Hartmann E, Kostka S, Rapoport TA: **Posttranslational protein**  
793 **transport in yeast reconstituted with a purified complex of Sec proteins and Kar2p.** *Cell*  
794 1995, **81**(4):561-570.
- 795 52. Babu M, Vlasblom J, Pu S, Guo X, Graham C, Bean BD, Burston HE, Vizeacoumar FJ,  
796 Snider J, Phanse S *et al*: **Interaction landscape of membrane-protein complexes in**  
797 **Saccharomyces cerevisiae.** *Nature* 2012, **489**(7417):585-589.

- 798 53. Zhao X, Jantti J: **Functional characterization of the trans-membrane domain interactions**  
799 **of the Sec61 protein translocation complex beta-subunit.** *BMC Cell Biol* 2009, **10**:76.
- 800 54. Habeck G, Ebner FA, Shimada-Kreft H, Kreft SG: **The yeast ERAD-C ubiquitin ligase**  
801 **Doa10 recognizes an intramembrane degron.** *The Journal of cell biology* 2015, **209**(4):621.
- 802 55. Carvalho P, Goder V, Rapoport TA: **Distinct ubiquitin-ligase complexes define**  
803 **convergent pathways for the degradation of ER proteins.** *Cell* 2006, **126**(2):361-373.
- 804 56. Deng M, Hochstrasser M: **Spatially regulated ubiquitin ligation by an ER/nuclear**  
805 **membrane ligase.** *Nature* 2006, **443**(7113):827-831.
- 806 57. Vashist S, Ng DT: **Misfolded proteins are sorted by a sequential checkpoint mechanism**  
807 **of ER quality control.** *The Journal of cell biology* 2004, **165**(1):41-52.
- 808 58. Ye YH, Meyer HH, Rapoport TA: **The AAA ATPase Cdc48/p97 and its partners transport**  
809 **proteins from the ER into the cytosol.** *Nature* 2001, **414**(6864):652-656.
- 810 59. Braun S, Matuschewski K, Rape M, Thoms S, Jentsch S: **Role of the ubiquitin-selective**  
811 **CDC48(UFD1/NPL4) chaperone (segregase) in ERAD of OLE1 and other substrates.** *The*  
812 *EMBO journal* 2002, **21**(4):615-621.
- 813 60. Suzuki T, Park H, Hollingsworth NM, Sternglanz R, Lennarz WJ: **PNG1, a yeast gene**  
814 **encoding a highly conserved peptide:N-glycanase.** *The Journal of cell biology* 2000,  
815 **149**(5):1039-1052.
- 816 61. Thibault G, Ng DT: **The endoplasmic reticulum-associated degradation pathways of**  
817 **budding yeast.** *Cold Spring Harb Perspect Biol* 2012, **4**(12).
- 818 62. Swanson R, Locher M, Hochstrasser M: **A conserved ubiquitin ligase of the nuclear**  
819 **envelope/endoplasmic reticulum that functions in both ER-associated and Matalpha2**  
820 **repressor degradation.** *Genes & development* 2001, **15**(20):2660-2674.
- 821 63. Hirsch C, Gauss R, Horn SC, Neuber O, Sommer T: **The ubiquitylation machinery of the**  
822 **endoplasmic reticulum.** *Nature* 2009, **458**(7237):453-460.
- 823 64. Brodsky JL, Skach WR: **Protein folding and quality control in the endoplasmic reticulum:**  
824 **Recent lessons from yeast and mammalian cell systems.** *Current opinion in cell biology*  
825 2011, **23**(4):464-475.
- 826 65. Finley D, Ulrich HD, Sommer T, Kaiser P: **The ubiquitin-proteasome system of**  
827 **Saccharomyces cerevisiae.** *Genetics* 2012, **192**(2):319-360.

- 828 66. Rubenstein EM, Kreft SG, Greenblatt W, Swanson R, Hochstrasser M: **Aberrant substrate**  
829 **engagement of the ER translocon triggers degradation by the Hrd1 ubiquitin ligase.**  
830 *The Journal of cell biology* 2012, **197**(6):761-773.
- 831 67. Christianson JC, Ye Y: **Cleaning up in the endoplasmic reticulum: ubiquitin in charge.**  
832 *Nat Struct Mol Biol* 2014, **21**(4):325-335.
- 833 68. Ruggiano A, Foresti O, Carvalho P: **Quality control: ER-associated degradation: protein**  
834 **quality control and beyond.** *The Journal of cell biology* 2014, **204**(6):869-879.
- 835 69. Zattas D, Hochstrasser M: **Ubiquitin-dependent protein degradation at the yeast**  
836 **endoplasmic reticulum and nuclear envelope.** *Crit Rev Biochem Mol Biol* 2015, **50**(1):1-17.
- 837 70. Malhotra N, Beaton MD: **Management of non-alcoholic fatty liver disease in 2015.** *World J*  
838 *Hepatol* 2015, **7**(30):2962-2967.
- 839 71. Doycheva I, Watt KD, Rifai G, Abou Mrad R, Lopez R, Zein NN, Carey WD, Alkhoury N:  
840 **Increasing Burden of Chronic Liver Disease Among Adolescents and Young Adults in**  
841 **the USA: A Silent Epidemic.** *Dig Dis Sci* 2017, **62**(5):1373-1380.
- 842 72. Puri P, Baillie RA, Wiest MM, Mirshahi F, Choudhury J, Cheung O, Sargeant C, Contos MJ,  
843 Sanyal AJ: **A lipidomic analysis of nonalcoholic fatty liver disease.** *Hepatology* 2007,  
844 **46**(4):1081-1090.
- 845 73. Wattacheril J, Seeley EH, Angel P, Chen H, Bowen BP, Lanciault C, Caprioli RM, Abumrad N,  
846 Flynn CR: **Differential intrahepatic phospholipid zonation in simple steatosis and**  
847 **nonalcoholic steatohepatitis.** *PloS one* 2013, **8**(2):e57165.
- 848 74. Puri P, Mirshahi F, Cheung O, Natarajan R, Maher JW, Kellum JM, Sanyal AJ: **Activation**  
849 **and dysregulation of the unfolded protein response in nonalcoholic fatty liver disease.**  
850 *Gastroenterology* 2008, **134**(2):568-576.
- 851 75. Yang L, Li P, Fu S, Calay ES, Hotamisligil GS: **Defective hepatic autophagy in obesity**  
852 **promotes ER stress and causes insulin resistance.** *Cell metabolism* 2010, **11**(6):467-478.
- 853 76. Szule JA, Fuller NL, Rand RP: **The effects of acyl chain length and saturation of**  
854 **diacylglycerols and phosphatidylcholines on membrane monolayer curvature.**  
855 *Biophysical journal* 2002, **83**(2):977-984.

- 856 77. Zinser E, Paltauf F, Daum G: **Sterol composition of yeast organelle membranes and**  
857 **subcellular distribution of enzymes involved in sterol metabolism.** *Journal of*  
858 *bacteriology* 1993, **175**(10):2853-2858.
- 859 78. Mansilla MC, Cybulski LE, Albanesi D, de Mendoza D: **Control of membrane lipid fluidity**  
860 **by molecular thermosensors.** *Journal of bacteriology* 2004, **186**(20):6681-6688.
- 861 79. Pineau L, Bonifait L, Berjeaud JM, Alimardani-Theuil P, Berges T, Ferreira T: **A lipid-**  
862 **mediated quality control process in the Golgi apparatus in yeast.** *Molecular biology of*  
863 *the cell* 2008, **19**(3):807-821.
- 864 80. Holthuis JC, Menon AK: **Lipid landscapes and pipelines in membrane homeostasis.**  
865 *Nature* 2014, **510**(7503):48-57.
- 866 81. Boban M, Ljungdahl PO, Foisner R: **Atypical ubiquitylation in yeast targets lysine-less**  
867 **Asi2 for proteasomal degradation.** *The Journal of biological chemistry* 2015, **290**(4):2489-  
868 2495.
- 869 82. Lauwers E, Grossmann G, Andre B: **Evidence for coupled biogenesis of yeast Gap1**  
870 **permease and sphingolipids: essential role in transport activity and normal control by**  
871 **ubiquitination.** *Molecular biology of the cell* 2007, **18**(8):3068-3080.
- 872 83. Payet LA, Pineau L, Snyder EC, Colas J, Moussa A, Vannier B, Bigay J, Clarhaut J, Becq F,  
873 Berjeaud JM *et al*: **Saturated fatty acids alter the late secretory pathway by modulating**  
874 **membrane properties.** *Traffic* 2013, **14**(12):1228-1241.
- 875 84. Babst M: **Quality control: quality control at the plasma membrane: one mechanism**  
876 **does not fit all.** *The Journal of cell biology* 2014, **205**(1):11-20.
- 877 85. Ginsberg BH, Brown TJ, Simon I, Spector AA: **Effect of the membrane lipid environment**  
878 **on the properties of insulin receptors.** *Diabetes* 1981, **30**(9):773-780.
- 879 86. Malhi H, Kaufman RJ: **Endoplasmic reticulum stress in liver disease.** *J Hepatol* 2011,  
880 **54**(4):795-809.
- 881 87. Bobenchik AM, Choi JY, Mishra A, Rujan IN, Hao B, Voelker DR, Hoch JC, Ben Mamoun C:  
882 **Identification of inhibitors of Plasmodium falciparum phosphoethanolamine**  
883 **methyltransferase using an enzyme-coupled transmethylation assay.** *Bmc Biochem*  
884 2010, **11**.

- 885 88. Holz GG, Jr.: **Lipids and the malarial parasite.** *Bull World Health Organ* 1977, **55**(2-3):237-  
886 248.
- 887 89. Pessi G, Ben Mamoun C: **Pathways for phosphatidylcholine biosynthesis: targets and**  
888 **strategies for antimalarial drugs.** *Future Lipidol* 2006, **1**(2):173-180.
- 889 90. Mok S, Ashley EA, Ferreira PE, Zhu L, Lin Z, Yeo T, Chotivanich K, Imwong M,  
890 Pukrittayakamee S, Dhorda M *et al*: **Drug resistance. Population transcriptomics of**  
891 **human malaria parasites reveals the mechanism of artemisinin resistance.** *Science*  
892 2015, **347**(6220):431-435.
- 893 91. Ben Mamoun C, Prigge ST, Vial H: **Targeting the Lipid Metabolic Pathways for the**  
894 **Treatment of Malaria.** *Drug Dev Res* 2010, **71**(1):44-55.
- 895 92. Bi M, Naczki C, Koritzinsky M, Fels D, Blais J, Hu N, Harding H, Novoa I, Varia M, Raleigh J  
896 *et al*: **ER stress-regulated translation increases tolerance to extreme hypoxia and**  
897 **promotes tumor growth.** *The EMBO journal* 2005, **24**(19):3470-3481.
- 898 93. Nelson DR, Lawson JE, Klingenberg M, Douglas MG: **Site-directed mutagenesis of the**  
899 **yeast mitochondrial ADP/ATP translocator. Six arginines and one lysine are essential.**  
900 *J Mol Biol* 1993, **230**(4):1159-1170.
- 901 94. Prasad R, Kawaguchi S, Ng DT: **A nucleus-based quality control mechanism for**  
902 **cytosolic proteins.** *Molecular biology of the cell* 2010, **21**(13):2117-2127.
- 903 95. Spear ED, Ng DT: **Stress tolerance of misfolded carboxypeptidase Y requires**  
904 **maintenance of protein trafficking and degradative pathways.** *Molecular biology of the*  
905 *cell* 2003, **14**(7):2756-2767.
- 906 96. Wang S, Thibault G, Ng DT: **Routing misfolded proteins through the multivesicular body**  
907 **(MVB) pathway protects against proteotoxicity.** *The Journal of biological chemistry* 2011,  
908 **286**(33):29376-29387.
- 909 97. Day CA, Kraft LJ, Kang M, Kenworthy AK: **Analysis of protein and lipid dynamics using**  
910 **confocal fluorescence recovery after photobleaching (FRAP).** *Curr Protoc Cytom* 2012,  
911 **Chapter 2:Unit2** 19.
- 912 98. Feder TJ, Brust-Mascher I, Slattery JP, Baird B, Webb WW: **Constrained diffusion or**  
913 **immobile fraction on cell surfaces: a new interpretation.** *Biophysical journal* 1996,  
914 **70**(6):2767-2773.

915 99. Biederer T, Volkwein C, Sommer T: **Degradation of subunits of the Sec61p complex, an**  
916 **integral component of the ER membrane, by the ubiquitin-proteasome pathway.** *The*  
917 *EMBO journal* 1996, **15**(9):2069-2076.

918

919

920

921

922

923

924

925

926

927

928

929

930

931

932

933

934

935

936

937

938

939

940

941

942

943

944

945 **FIGURE LEGENDS**

946 **Figure 1. A subset of ER transmembrane proteins is prematurely degraded under lipid**  
947 **imbalance.**

948 (a) Metabolic pathways for the synthesis of phosphatidylcholine in *S. cerevisiae*. PE,  
949 phosphatidylethanolamine; MMPE, *N*-monomethyl phosphatidylethanolamine; DMPE, *N,N*-dimethyl  
950 phosphatidylethanolamine; PC, phosphatidylcholine; DAG, diacylglycerol; CDP-choline, cytidine  
951 diphosphate-choline; P-choline, phosphate-choline. (b) Steady state level of transmembrane proteins.  
952 Equal cell numbers were harvested. Proteins were separated by SDS-PAGE and detected by  
953 immunoblotting with antibodies against the HA tag and Tub1 as loading control. <sup>a</sup> $P < 0.05$ , <sup>b</sup> $P < 0.01$ ,  
954 <sup>c</sup> $P < 0.005$ , Student's t test. (c) Degradation of HA-tagged proteins was analysed after blocking protein  
955 translation with cycloheximide. Proteins were separated by SDS-PAGE and detected by  
956 immunoblotting with antibodies against the HA tag and Pgk1 as loading control.

957

958 **Figure 2. Transmembrane proteins are destabilised by the decrease in phosphatidylcholine**  
959 **synthesis.**

960 (a) Protein candidates were detected using antibodies against HA tag and Kar2 as ER marker. Scale  
961 bar, 5  $\mu$ m. (b) Membranes prepared from wild type and *opi3* $\Delta$  cells expressing HA-tagged proteins  
962 were treated with 0.1 M sodium carbonate, pH 11, for 30 min on ice. A portion was kept as the total  
963 fraction (T), and the remaining was subjected to centrifugation at 100,000 X *g*. Supernatant (S) and  
964 membrane pellet (P) fractions were collected and analysed by immunoblotting. Proteins were  
965 detected using anti-HA antibody. Kar2 and Sec61 serve as soluble and integral membrane protein  
966 controls, respectively. (c) Membranes prepared from WT and *opi3* $\Delta$  cells expressing HA-tagged  
967 proteins were treated with 1 mg/ml proteinase K, for 30 min at 37°C, with or without 1% NP40. HA-  
968 tagged proteins were precipitated with 10% TCA, separated by SDS-PAGE and detected by  
969 immunoblotting with HA antibody. Expected protein molecular weights are shown below for non-  
970 digested (N), digested (D), and flipped and digested (F). The orientation of the HA tag is shown as  
971 black dot. Fragments missing the HA tag and are therefore undetectable are illustrated with  
972 transparency. The ER lumen and cytosol are at the top and bottom of the membrane, respectively.

973

974



975 **Figure 3. Sbh1 is destabilised from increased membrane fluidity of the ER membrane.**

976 (a) Cells were grown with or without 1 mM choline before addition of cycloheximide. Time points were  
977 taken as indicated. Proteins were separated by SDS-PAGE and detected by immunoblotting with  
978 antibodies against the HA tag and Tub1 as loading control. (b) Heat map of  $\log_2$ -transformed fold  
979 changes (FC) in fatty acids (FA) in *opi3Δ* as compared to WT. FAs in whole cells and microsomes  
980 (ER) of WT and *opi3Δ* were quantified by gas chromatography after FAME derivatisation. (c-e)  
981 Fluorescence recovery after photobleaching using Sec63-sGFP in WT and *opi3Δ*. (c) Averages of  
982 Sec63-sGFP signal intensity from 20 cells are plotted over a 60-second period. (d) Fluorescence  
983 intensity was monitored from the white boxes ROI (region of interest), REF (reference), and BG  
984 (background). Scale bar, 5  $\mu$ m. A region of the cortical ER of live cells were photobleached and  
985 recovery points at 1.57 s intervals were taken. (e) The time elapsed for the half-maximal fluorescence  
986 recovery ( $t_{1/2}$ ) was calculated and plotted. Student's t test compared to WT.

987

988 **Figure 4. Sbh1 binding to interacting partners is compromised under lipid imbalance.**

989 (a,b) Proteins identified as interacting partners of N-termini reporter tagged Sbh1 (TF-C<sub>ub</sub>-Sbh1) by  
990 the MYTH method in WT (A) and *opi3Δ* (B) cells. ERAD factors were only detected in *opi3Δ* and are  
991 denoted in red. Previously reported interactors of Sbh1 are indicated with black dots. (c) The  
992 degradation of Sec61 or Sss1-Flag was analysed in WT and *opi3Δ* cells after blocking translation with  
993 cycloheximide. Proteins were separated by SDS-PAGE and detected by immunoblotting with  
994 antibodies against Sec61 or Flag tag and Tub1 as loading control. (d) Immunoprecipitation of Sbh1-  
995 HA with protein G beads were analysed in WT and *opi3Δ* native cell lysates. Eluted and input  
996 fractions were resolved by SDS-PAGE, transferred to nitrocellulose membrane, and analysed by  
997 immunoblotting with antibodies against Sec61 and the HA tag after the release of HA bound Sbh1  
998 with HA peptide.

999

1000 **Figure 5. Sbh1 is destabilised from its transmembrane domain and degraded in a Doa10-**  
1001 **dependent manner.**

1002 (a) The degradation of Sbh1-HA was analysed in WT, *opi3Δ*, *opi3Δdoa10Δ*, *opi3Δhrd1Δ*, and  
1003 *opi3Δusa1Δ* cells after blocking translation with cycloheximide. Proteins were separated by SDS-  
1004 PAGE and detected by immunoblotting with antibodies against the HA tag and Tub1 as loading

1005 control. **(b)** The degradation of Sbh1-HA in WT and *opi3Δ* cells or Sbh1 cytosolic lysine mutant in  
1006 *opi3Δ* cells treated as in **a**. **(c)** Sbh1 percentage remaining at the 60 min time point from **b**. **(d)** The  
1007 degradation of Sbh1-HA in WT and *opi3Δ* cells or Sbh1 all cytosolic lysine mutated to alanine  
1008 [Sbh1(6KA)] in *opi3Δ* cells treated as in **a**. **(e)** Sbh1 percentage remaining at the 60 min time point  
1009 from **d**. **(f)** The degradation of mutant Sbh2 with amino acids 61 and 68 mutated to proline and  
1010 alanine, respectively [HA-Sbh2(S61P,S68A)], and chimeric Sbh1 protein with its transmembrane  
1011 domain replaced with that of Sbh2 (HA-Sbh121) in WT and *opi3Δ* cells treated as in **a**. The ER lumen  
1012 and cytosol are at the top and bottom of the membrane, respectively.

1013

1014 **Figure 6. Premature degradation of TPs leads to chronic ER stress and development of**  
1015 **NAFLD.**

1016 Normally, ER homeostasis can be reached from lipid perturbation through the regulation of  
1017 downstream UPR target genes. UPR transactivator (yellow protein representing Ire1, PERK, or ATF6)  
1018 senses ER stress from the accumulation of misfolded proteins and/or lipid perturbation. However,  
1019 under prolonged LP, ER homeostasis could not be achieved due to the premature degradation of a  
1020 subset of misfolded proteins (blue protein) leading to chronic ER stress, cell death, and eventually the  
1021 development of NAFLD.

1022

1023

1024

1025

1026

1027

1028

1029

1030

1031

1032

1033

1034

1035 **ADDITIONAL FILES**

1036

1037 **Additional file 1:** Supplemental methods and data, **Figures S1-S3**, and **Tables S2-S4**. (PDF file)

1038 **Additional file 2: Table S1.** List of genes upregulated transcriptionally but having lower protein  
1039 abundance under LP. (XLSX file)

1040

1041

1042 **SUPPLEMENTARY FIGURE LEGEND**

1043

1044 **Figure S1. Strong activation of the UPR does not destabilise Sbh1.**

1045 (a) The degradation of Sbh1-HA was analysed in WT and *opi3Δ* cells containing control vector (ve) or  
1046 *HAC1<sup>i</sup>*-bearing plasmid after blocking translation with cycloheximide. Proteins were separated by  
1047 SDS-PAGE and detected by immunoblotting with antibodies against the HA tag and Tub1 as loading  
1048 control. (b) Cells were grown to early log phase at 30°C in selective synthetic complete media. UPR  
1049 induction was measured using a *UPRE-LacZ* reporter assay. Tm, tunicamycin.

1050

1051 **Figure S2. Validation of Sbh1 interacting partners.**

1052 (a) N-termini reporter tagged Sbh1 (TF-*C<sub>ub</sub>*-Sbh1) remains localised to the ER membrane in both WT  
1053 and *opi3Δ*. Protein candidates were detected using antibodies against LexA and *eroGFP* as ER  
1054 marker. Scale bar, 5 μm. (b) Interacting proteins of N-tagged (TF-*C<sub>ub</sub>*-Sbh1) were retransformed with  
1055 the original bait strain, together with a negative control using the single-pass transmembrane domain  
1056 of human T-cell surface glycoprotein CD4 tagged to *C<sub>ub</sub>*-LexA-VP16 MYTH. Positive control of  
1057 pOST1-*N<sub>ub</sub>*I bait was used (ve ctrl). Tm, tunicamycin.

1058

1059 **Figure S3. Sbh1 is degraded by the ERAD and not the vacuolar pathways.**

1060 The degradation of Sbh1-HA was analysed in WT, *opi3Δ*, *opi3Δcue1Δ*, and *opi3Δpep4Δ* cells after  
1061 blocking translation with cycloheximide. Proteins were separated by SDS-PAGE and detected by  
1062 immunoblotting with antibodies against the HA tag and PGK1 as loading control.

1063

1064

1065

1066 **Table S2. Strains used in the study**

| <b>Strains</b> | <b>Genotype</b>                                                                                                                               | <b>Source</b> |
|----------------|-----------------------------------------------------------------------------------------------------------------------------------------------|---------------|
| W303a          | <i>MATa, leu2-3,112, his3-11, trp1-1, ura3-1, can1-100, ade2-1</i>                                                                            | [14]          |
| GTY68          | <i>MATa, opi3::KANMX, W303 background</i>                                                                                                     | [13]          |
| YGT0315        | <i>MATa, pGT0181, W303 background</i>                                                                                                         | This study    |
| YGT0317        | <i>MATa, opi3::KANMX, pGT0181, W303 background</i>                                                                                            | This study    |
| YGT0318        | <i>MATa, pGT0182, W303 background</i>                                                                                                         | This study    |
| YGT0320        | <i>MATa, opi3::KANMX, pGT0182, W303 background</i>                                                                                            | This study    |
| YGT0321        | <i>MATa, pGT0179, W303 background</i>                                                                                                         | This study    |
| YGT0323        | <i>MATa, opi3::KANMX, pGT0179, W303 background</i>                                                                                            | This study    |
| YGT0327        | <i>MATa, pGT0185, W303 background</i>                                                                                                         | This study    |
| YGT0329        | <i>MATa, opi3::KANMX, pGT0185, W303 background</i>                                                                                            | This study    |
| YGT0330        | <i>MATa, pGT0315, W303 background</i>                                                                                                         | This study    |
| YGT0332        | <i>MATa, opi3::KANMX, pGT0315, W303 background</i>                                                                                            | This study    |
| YGT0374        | <i>MATa, pGT0183, W303 background</i>                                                                                                         | This study    |
| YGT0375        | <i>MATa, opi3::KANMX, pGT0183, W303 background</i>                                                                                            | This study    |
| YGT0432        | <i>MATa, pJC835, W303 background</i>                                                                                                          | This study    |
| YGT0540        | <i>MATa, pGT0288, NMY51 background (his3Δ200, trp-901, leu2-3,112, ade2, LYS::(lexAop)4-HIS3, ura3::(lexAop)8-LACZ, (lexAop)8-ADE2, GAL4)</i> | This study    |
| YGT0541        | <i>MATa, opi3::KANMX, pGT0183, NMY51 background</i>                                                                                           | This study    |
| YGT0574        | <i>MATa, doa10::KANMX, opi3::KANMX, pGT0183, W303 background</i>                                                                              | This study    |
| YGT0575        | <i>MATa, hrd1::KANMX, opi3::KANMX, pGT0183, W303 background</i>                                                                               | This study    |
| YGT0576        | <i>MATa, usa11::KANMX, opi3::KANMX, pGT0183, W303 background</i>                                                                              | This study    |
| YGT0671        | <i>MATa, pGT0352, W303 background</i>                                                                                                         | This study    |
| YGT0672        | <i>MATa, opi3::KANMX, pGT0352, W303 background</i>                                                                                            | This study    |
| YGT0673        | <i>MATa, pGT0183, pRS313, W303 background</i>                                                                                                 | This study    |
| YGT0674        | <i>MATa, opi3::KANMX, pGT0183, pRS313, W303 background</i>                                                                                    | This study    |
| YGT0675        | <i>MATa, pGT0183, pGT0349, W303 background</i>                                                                                                | This study    |
| YGT0676        | <i>MATa, opi3::KANMX, pGT0183, pGT0349, W303 background</i>                                                                                   | This study    |
| YGT0690        | <i>MATa, pGT0180, W303 background</i>                                                                                                         | This study    |
| YGT0691        | <i>MATa, opi3::KANMX, pGT0180, W303 background</i>                                                                                            | This study    |
| YGT0721        | <i>MATa, pGT0350, pGT0183, W303 background</i>                                                                                                | This study    |
| YGT0722        | <i>MATa, opi3::KANMX, pGT0350, pGT0183, W303 background</i>                                                                                   | This study    |
| YGT0725        | <i>MATa, pGT0350, pRS315, W303 background</i>                                                                                                 | This study    |
| YGT0726        | <i>MATa, opi3::KANMX, pGT0350, pRS315, W303 background</i>                                                                                    | This study    |
| YGT0769        | <i>MATa, pGT0366, W303 background</i>                                                                                                         | This study    |
| YGT0770        | <i>MATa, opi3::KANMX, pGT0366, W303 background</i>                                                                                            | This study    |
| YGT0771        | <i>MATa, pGT0368, W303 background</i>                                                                                                         | This study    |
| YGT0772        | <i>MATa, opi3::KANMX, pGT0368, W303 background</i>                                                                                            | This study    |
| YGT0773        | <i>MATa, pGT0365, W303 background</i>                                                                                                         | This study    |
| YGT0774        | <i>MATa, opi3::KANMX, pGT0365, W303 background</i>                                                                                            | This study    |
| YGT0874        | <i>MATa, pPS1622, pRS313, W303 background</i>                                                                                                 | This study    |
| YGT0875        | <i>MATa, opi3::KANMX, pPS1622, pRS313, W303 background</i>                                                                                    | This study    |
| YGT0876        | <i>MATa, pGT0349, pPS1622, W303 background</i>                                                                                                | This study    |
| YGT0877        | <i>MATa, opi3::KANMX, pGT0349, pPS1622, W303 background</i>                                                                                   | This study    |
| YGT1122        | <i>MATa, pGT0445, W303 background</i>                                                                                                         | This study    |
| YGT1123        | <i>MATa, opi3::KANMX, pGT0445, W303 background</i>                                                                                            | This study    |
| YGT1124        | <i>MATa, pGT0446, W303 background</i>                                                                                                         | This study    |
| YGT1125        | <i>MATa, opi3::KANMX, pGT0446, W303 background</i>                                                                                            | This study    |
| YGT1126        | <i>MATa, pGT0447, W303 background</i>                                                                                                         | This study    |
| YGT1127        | <i>MATa, opi3::KANMX, pGT0447, W303 background</i>                                                                                            | This study    |
| YGT1148        | <i>MATa, pGT0459, W303 background</i>                                                                                                         | This study    |
| YGT1149        | <i>MATa, opi3::KANMX, pGT0459, W303 background</i>                                                                                            | This study    |
| YGT1167        | <i>MATa, STK05-5-9, W303 background</i>                                                                                                       | This study    |
| YGT1168        | <i>MATa, opi3::KANMX, STK05-5-9, W303 background</i>                                                                                          | This study    |
| YGT1169        | <i>MATa, STK05-8-5, W303 background</i>                                                                                                       | This study    |
| YGT1170        | <i>MATa, opi3::KANMX, STK05-8-5, W303 background</i>                                                                                          | This study    |

1067 **Table S3. Plasmids used in the study**

| <b>Plasmid</b> | <b>Encoded protein</b>          | <b>Promoter</b>  | <b>Vector</b> | <b>Source</b> |
|----------------|---------------------------------|------------------|---------------|---------------|
| pJC31          | $\beta$ -galactosidase          | <i>UPRC-CYC1</i> | pRS315        | [100]         |
| pPS1622        | Sec63-sGFP                      | <i>SEC63</i>     | pRS316        | [101]         |
| pJC835         | Hac1                            | <i>HAC1</i>      | pRS313        | [14]          |
| pGT0284        | IRE1-3X FLAG                    | <i>IRE1</i>      | pRS426        | [102]         |
| pPM28          | eroGFP                          | <i>GAP</i>       | pRS316        | [103]         |
| STK05-5-9      | HA-Sbh2(S61P,S68A)              | <i>MET25</i>     | p413MET25     | [104]         |
| STK05-8-5      | HA-Sbh121                       | <i>MET25</i>     | p413MET25     | [104]         |
| pGT0179        | Nsg2-HA                         | <i>NSG2</i>      | pRS315        | This study    |
| pGT0181        | Cue1-HA                         | <i>CUE1</i>      | pRS315        | This study    |
| pGT0183        | Sbh1-HA                         | <i>SBH1</i>      | pRS315        | This study    |
| pGT0185        | Emc4-HA                         | <i>EMC4</i>      | pRS315        | This study    |
| pGT0288        | C <sub>ub</sub> -LexA-VP16-Sbh1 | <i>CYC1</i>      | pBT3-N        | This study    |
| pGT0352        | Sbh1(K41A)-HA                   | <i>SBH1</i>      | pRS315        | This study    |
| pGT0350        | Sss1-3XFlag                     | <i>SSS1</i>      | pRS313        | This study    |
| pGT0445        | Sbh1(K15/17A)-HA                | <i>SBH1</i>      | pRS315        | This study    |
| pGT0446        | Sbh1(K23A)-HA                   | <i>SBH1</i>      | pRS315        | This study    |
| pGT0447        | Sbh1(K30/31)-HA                 | <i>SBH1</i>      | pRS315        | This study    |
| pGT0459        | Sbh1(6KA)-HA                    | <i>SBH1</i>      | pRS315        | This study    |

1068

1069

1070

1071

1072

1073

1074

1075

1076

1077

1078

1079

1080

1081

1082

1083

1084

1085

1086

1087

1088 **Table S4. Oligonucleotide primers used in the study**

| Primer | Sequence (5' to 3')                                    |
|--------|--------------------------------------------------------|
| BN013  | CCGCGGTGGCGGCCGCGCCACTAGCCGATGTTATC                    |
| BN014  | GTAGTCCGCATGCCCAACAATAACGTATCTGATTGG                   |
| BN015  | GGGCATGCGGACTACAAAGACCATGACG                           |
| BN016  | CGGCCGCCACCGCGGTGG                                     |
| BN027  | ATGAGGGCCATTACGGCCATGTCAAGCCCAACTCCTCC                 |
| BN028  | CTCATGGCCGAGGCGGCCTTAAAATAACTTACCGGCAACTTTAGAAATAACATG |
| BN029  | CTCATGCTGCAGATGGAGGATTCGAGATTGCTTATCACTTTG             |
| BN030  | CTCATGCCATGGGAGTCAGCAAACCTTTGCAAATCTTTATCAC            |
| BN031  | AACGTCGCGGCCGCGCAGCAAATGATTCCTCGACTGAATATAAAGG         |
| BN032  | CCATGGCGCGCTAATCGGAAAACCATGTAATCCATTATTATAATGAGCA      |
| BN033  | CTCATGCTGCAGATGGCCAATAGAGGAGAACCGG                     |
| BN034  | CTCATGCCATGGGATGAGAATATAGATATCTTCCTAGTTTTCCAAACATTAG   |
| BN035  | CTCATGCTGCAGATGTCAAGCCCAACTCCTCC                       |
| BN036  | CTCATGCCATGGGAAATAACTTACCGGCAACTTTAGAAATAACATG         |
| BN037  | AATTCGATTTTGGCGATTTATTCTGAT                            |
| BN038  | ATTGCTGTTCGTGTTTTTCTTTGGAGC                            |
| PS139  | TACTTTGCAAGCGAGAGCACAGGGAAGTTC                         |
| PS140  | CGTTGACCACCTGGAGGAGTTGGG                               |
| PS141  | AAGTTCACAAGCAGTTGCGGCAT                                |
| PS142  | CCCTGTTTTCTCTTTTGCAAAGTACG                             |
| PS143  | ATCCGCTCCAGCGGCAAACACGAACA                             |
| PS144  | GCCGCAACTTTTTGTGAACTTCCCTGTTTT                         |
| PS153  | AAAGTTGCGGCATCCGCTC                                    |
| PS154  | TTGTGAACTTCCCTGTGCTCTCGCTTGCAAAG                       |

1089

1090

1091

1092

1093

1094

1095

1096

1097

1098

1099

1100

1101

1102

1103

1104

1105

1106 **SUPPLEMENTAL REFERENCES**

- 1107 100. Cox JS, Walter P: **A novel mechanism for regulating activity of a transcription factor**  
1108 **that controls the unfolded protein response.** *Cell* 1996, **87**(3):391-404.
- 1109 101. Prinz WA, Grzyb L, Veenhuis M, Kahana JA, Silver PA, Rapoport TA: **Mutants affecting the**  
1110 **structure of the cortical endoplasmic reticulum in *Saccharomyces cerevisiae*.** *The*  
1111 *Journal of cell biology* 2000, **150**(3):461-474.
- 1112 102. Kimata Y, Oikawa D, Shimizu Y, Ishiwata-Kimata Y, Kohno K: **A role for BiP as an adjustor**  
1113 **for the endoplasmic reticulum stress-sensing protein Ire1.** *The Journal of cell biology*  
1114 2004, **167**(3):445-456.
- 1115 103. Merksamer PI, Trusina A, Papa FR: **Real-time redox measurements during endoplasmic**  
1116 **reticulum stress reveal interlinked protein folding functions.** *Cell* 2008, **135**(5):933-947.
- 1117 104. Habeck G, Ebner FA, Shimada-Kreft H, Kreft SG: **The yeast ERAD-C ubiquitin ligase**  
1118 **Doa10 recognizes an intramembrane degron.** *The Journal of cell biology* 2015, **209**(2):261-  
1119 273.

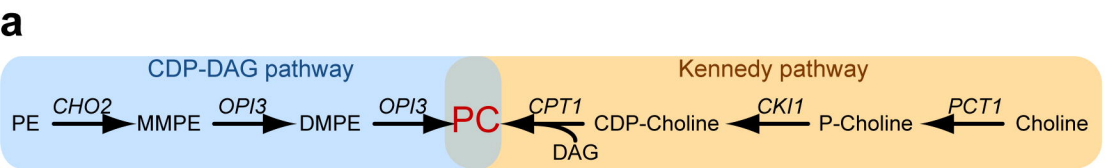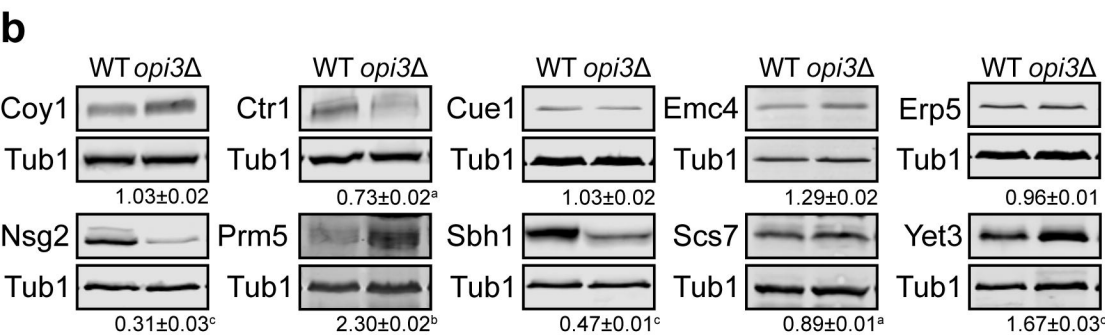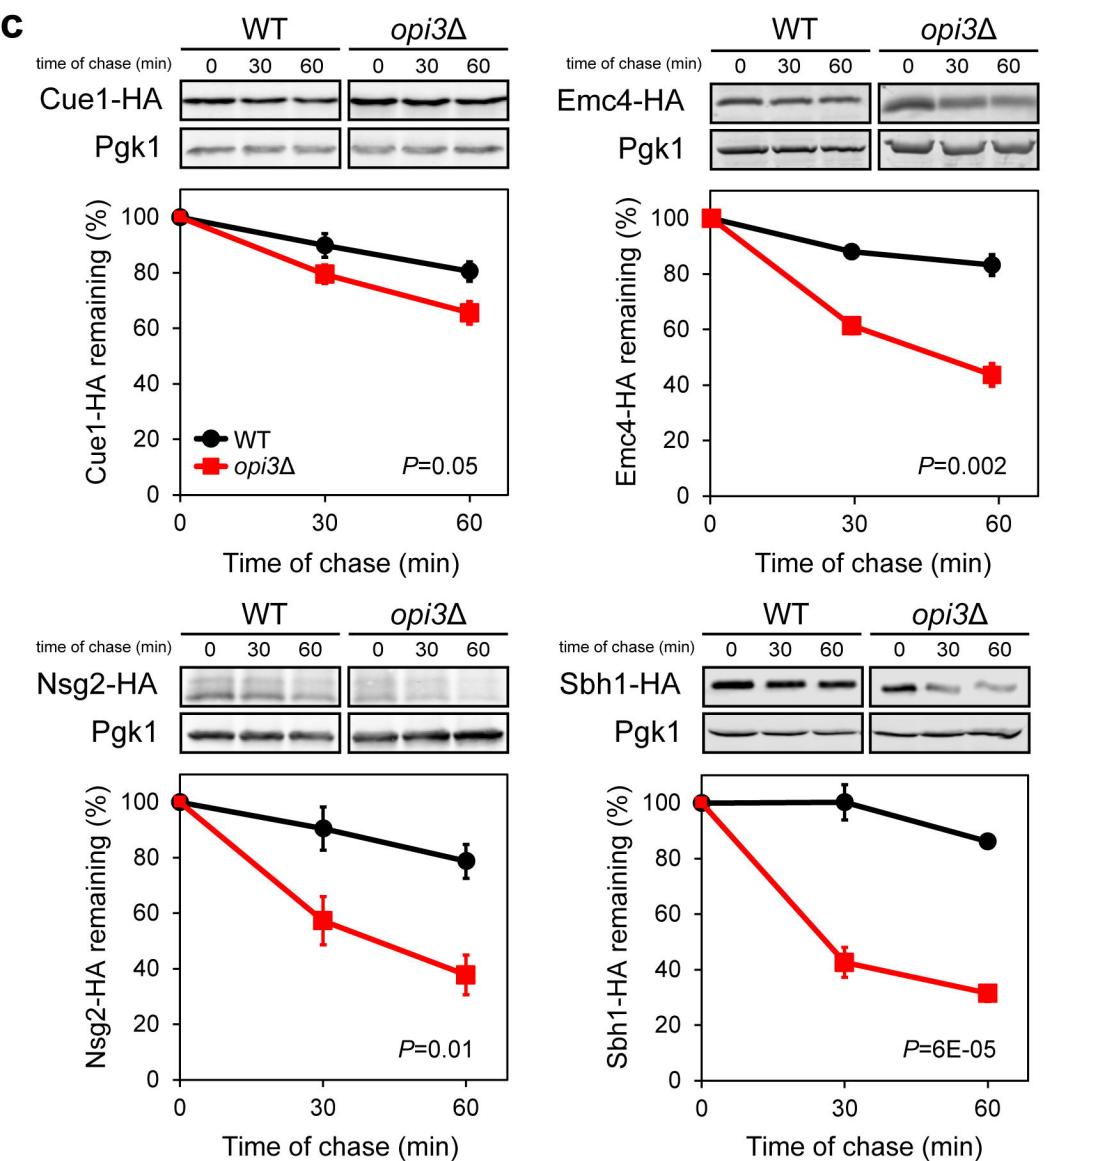

Figure 1



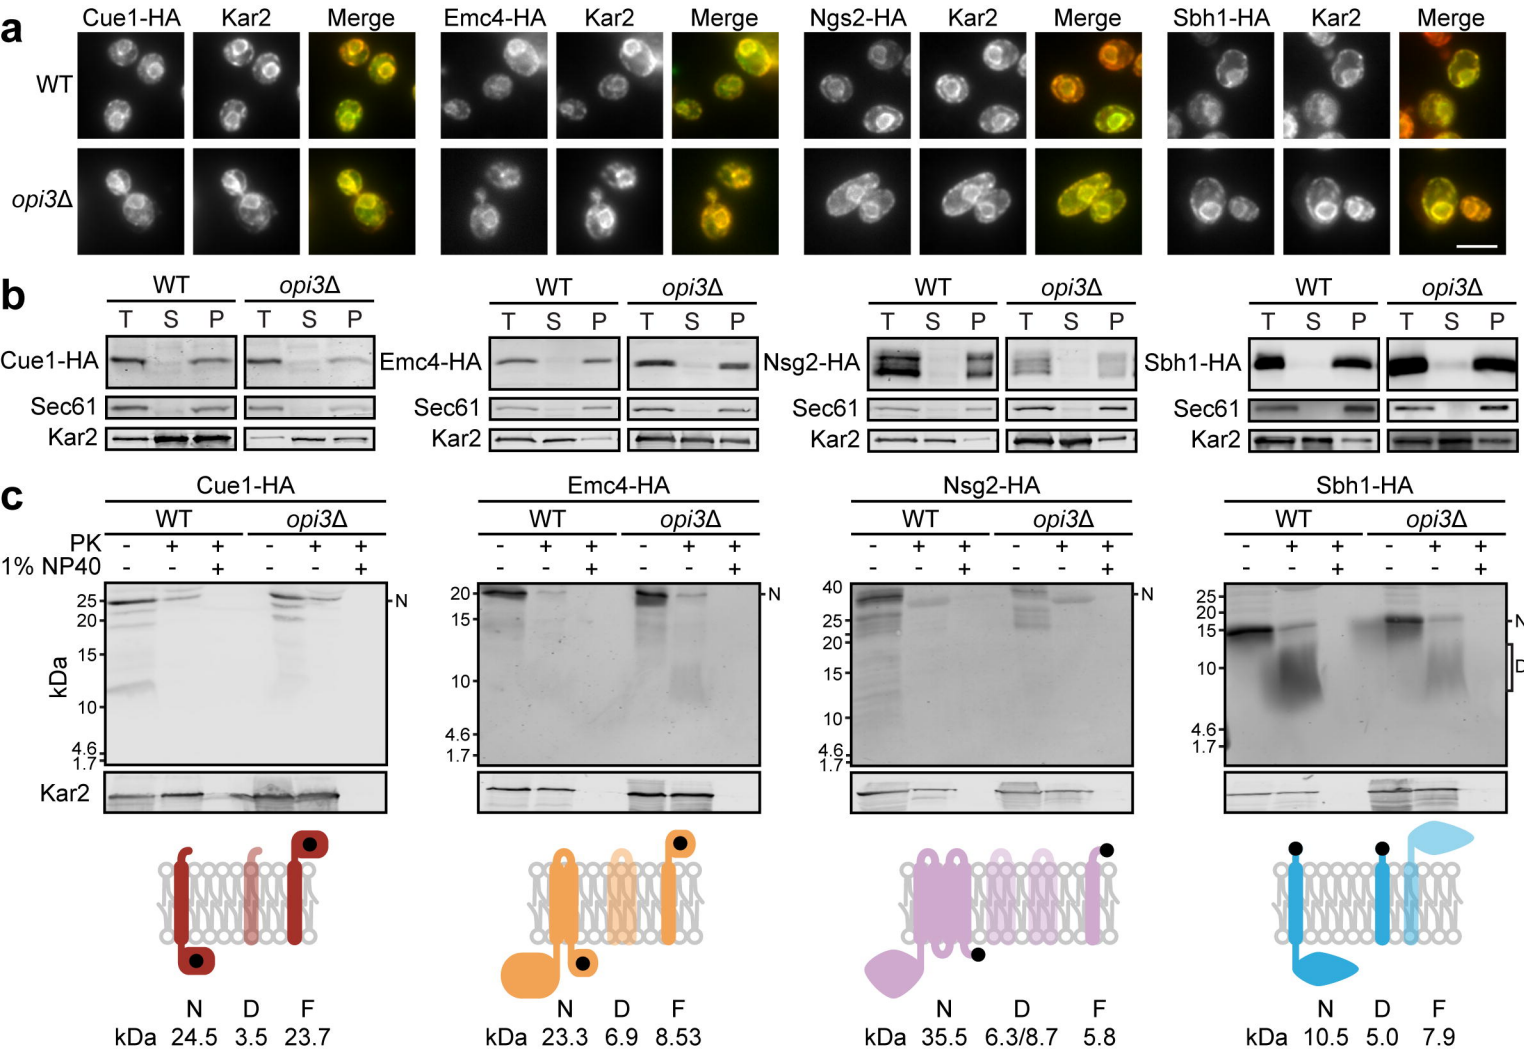

Figure 2

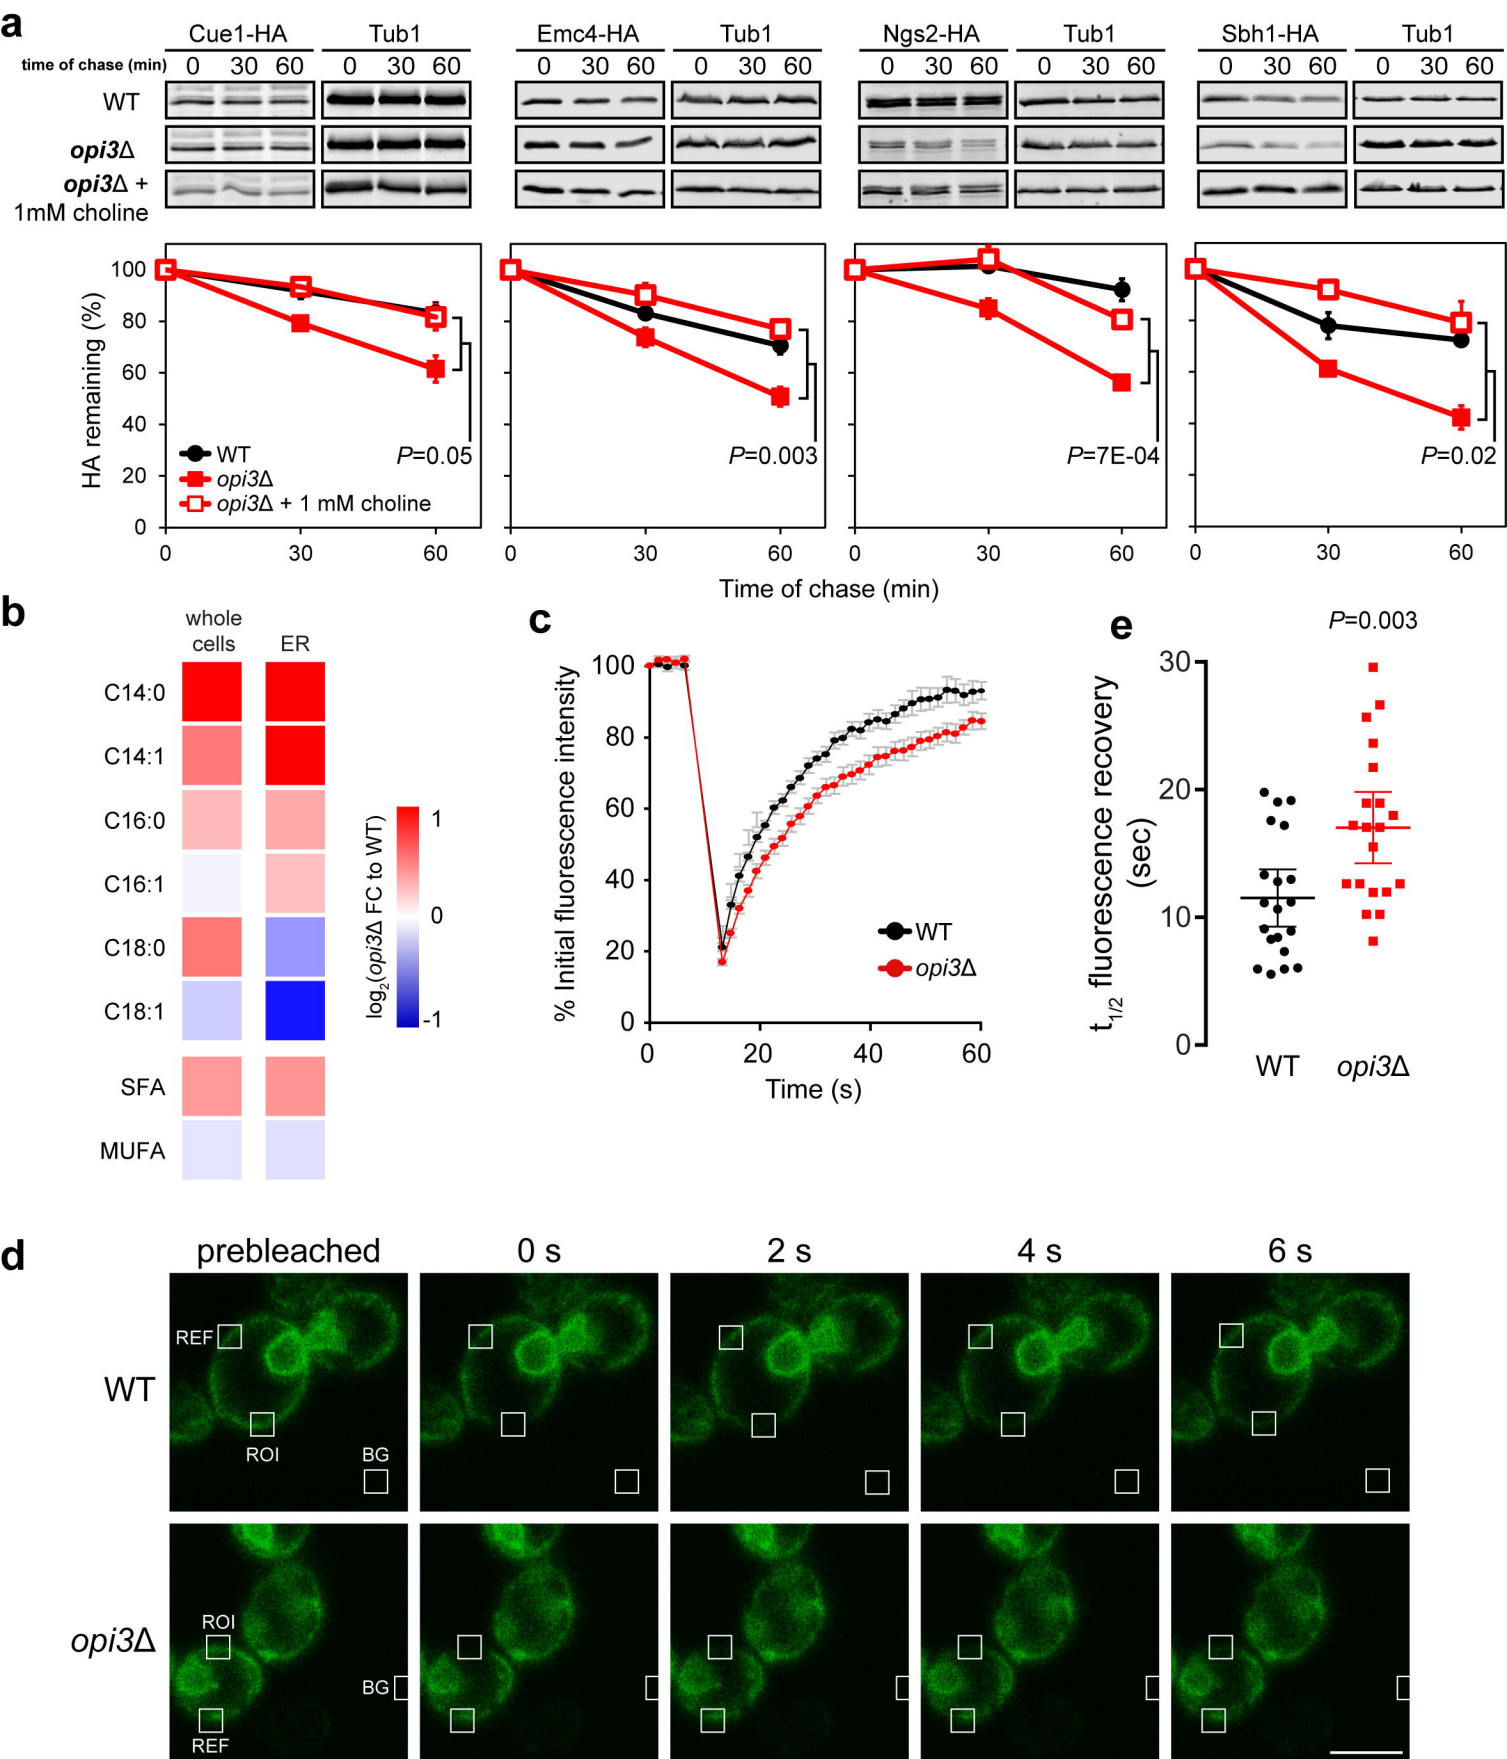

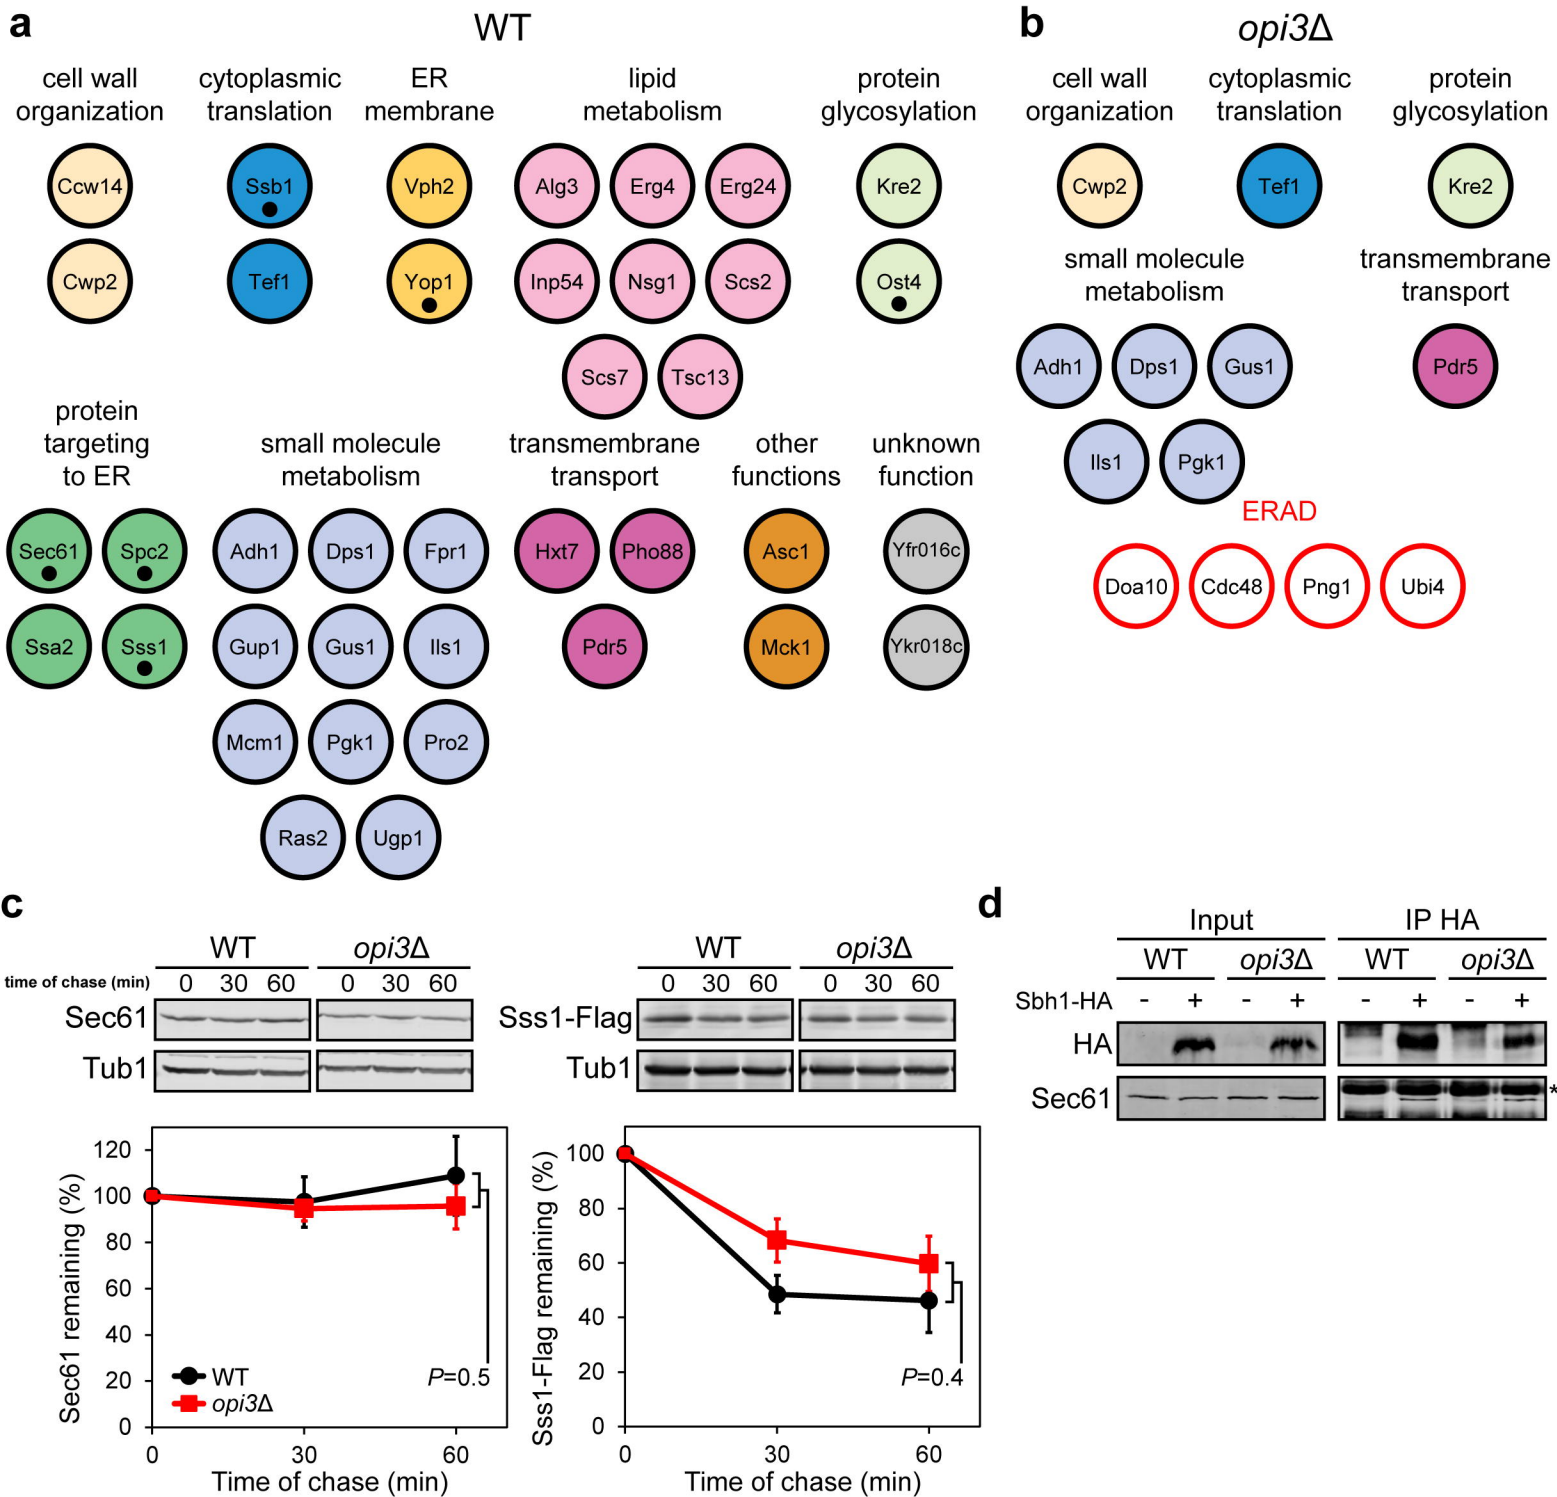

Figure 4

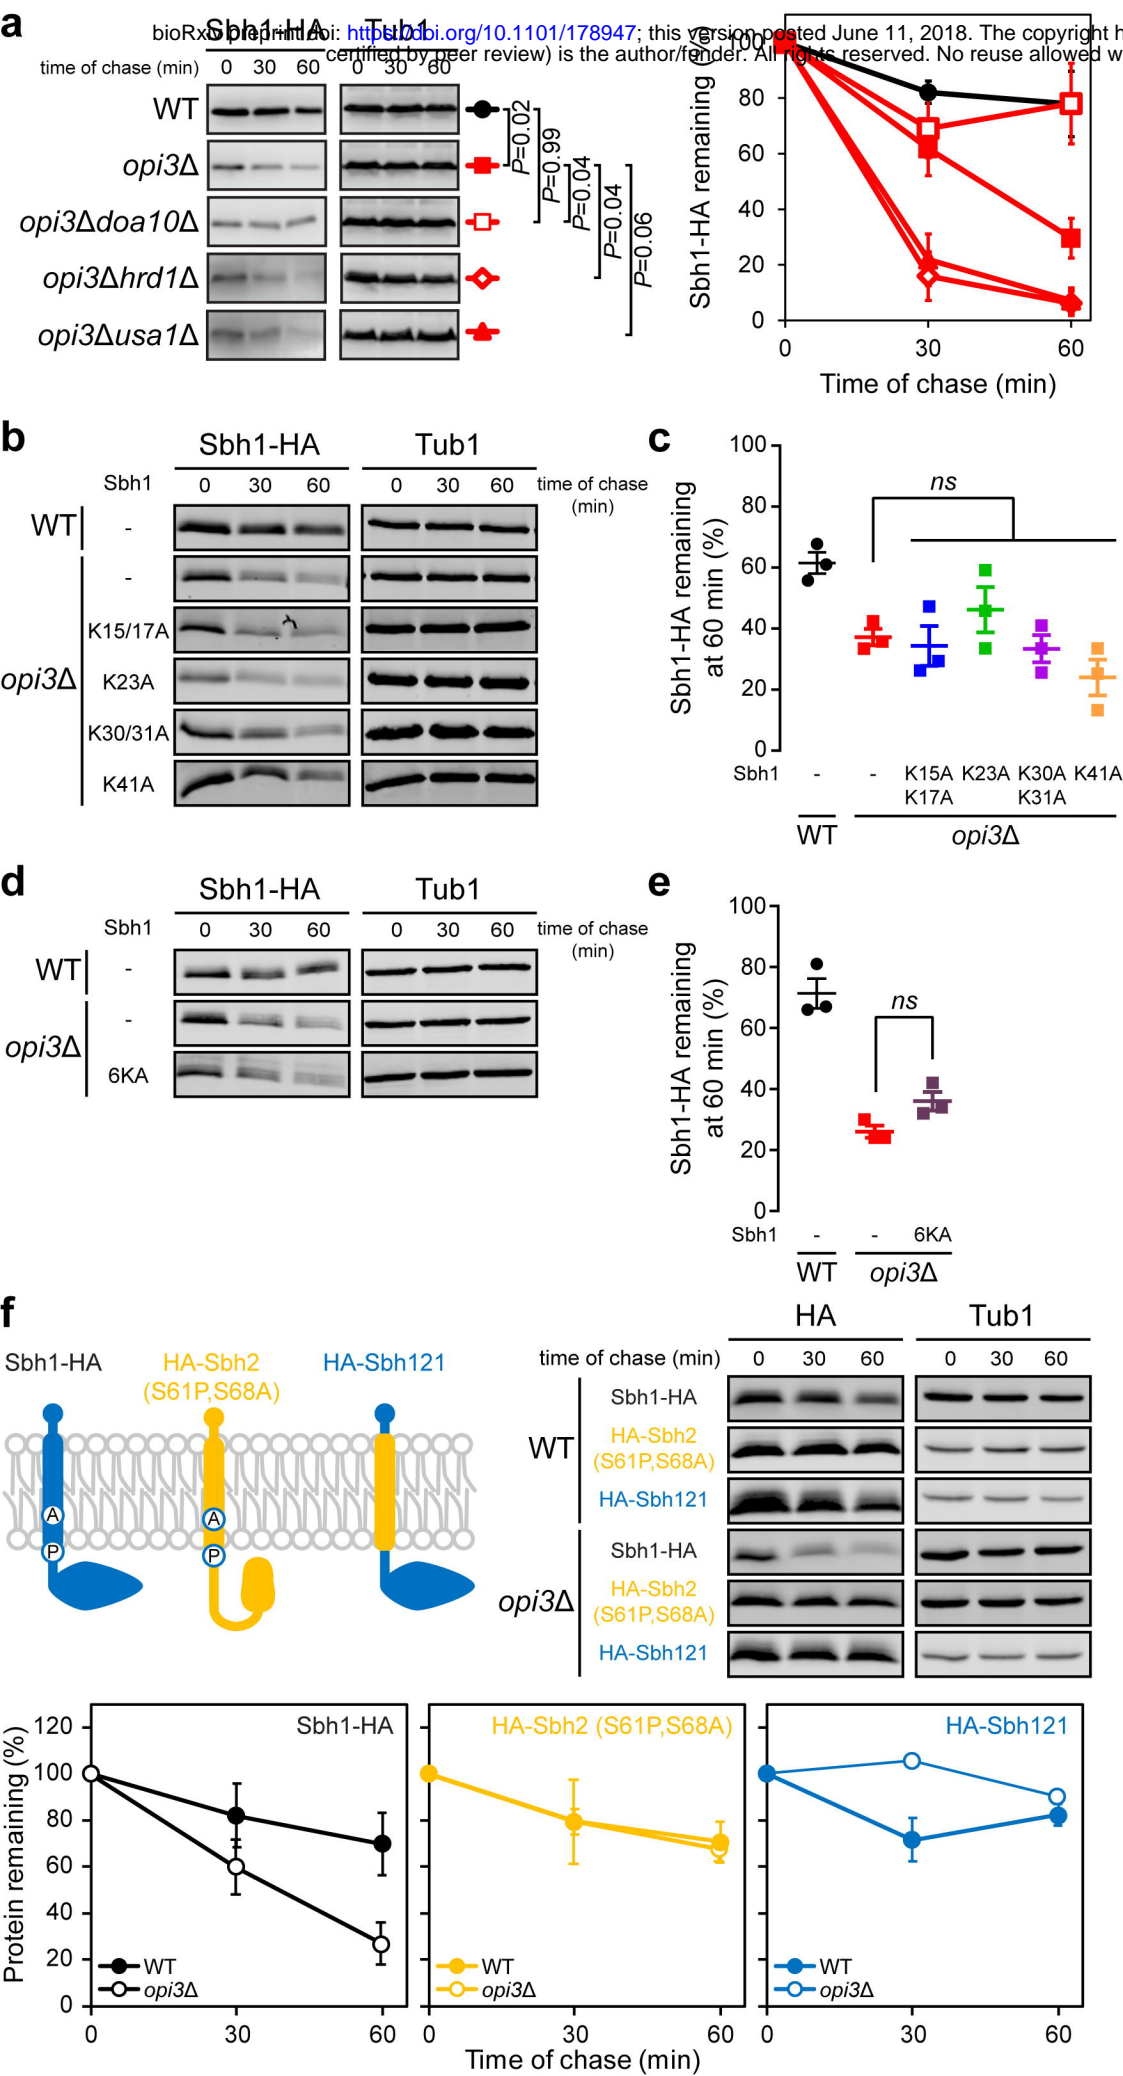

Figure 5

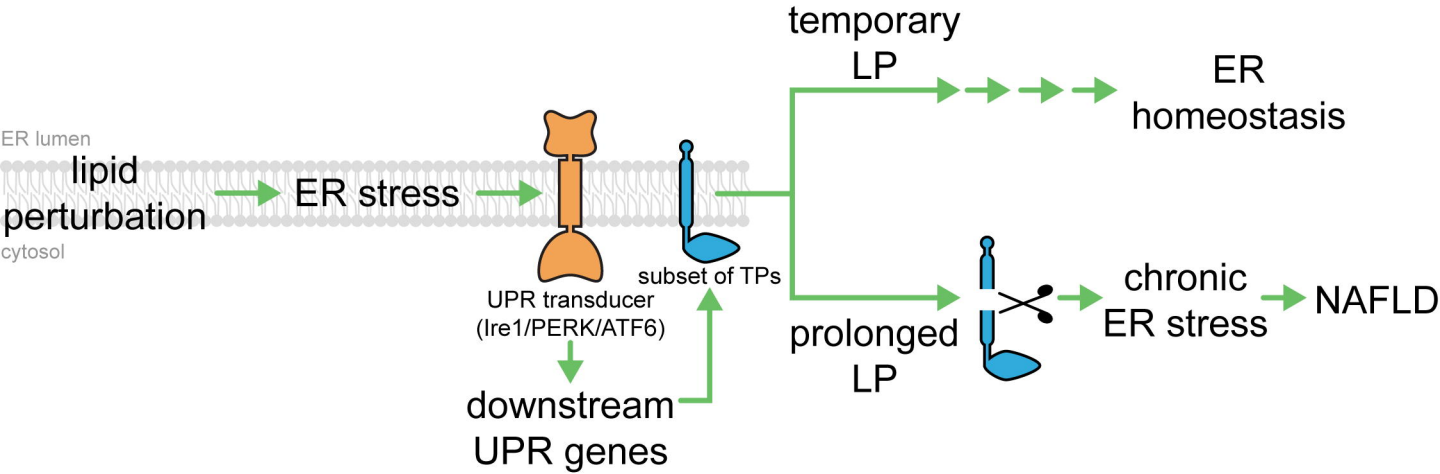

Figure 6

**a**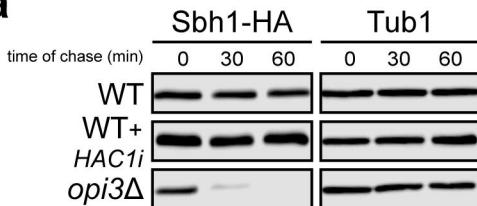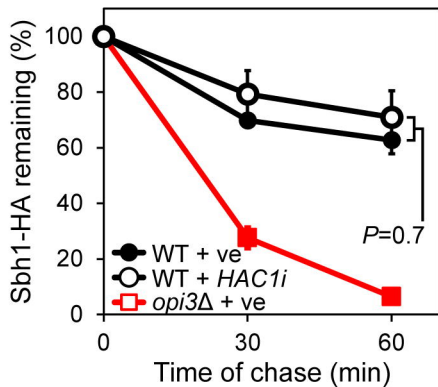**b**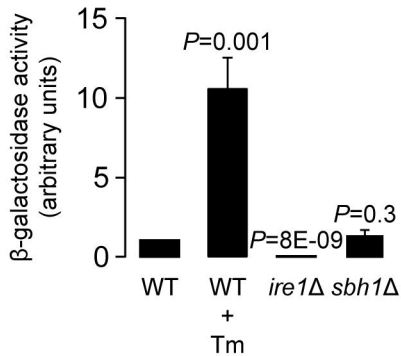

Figure S1

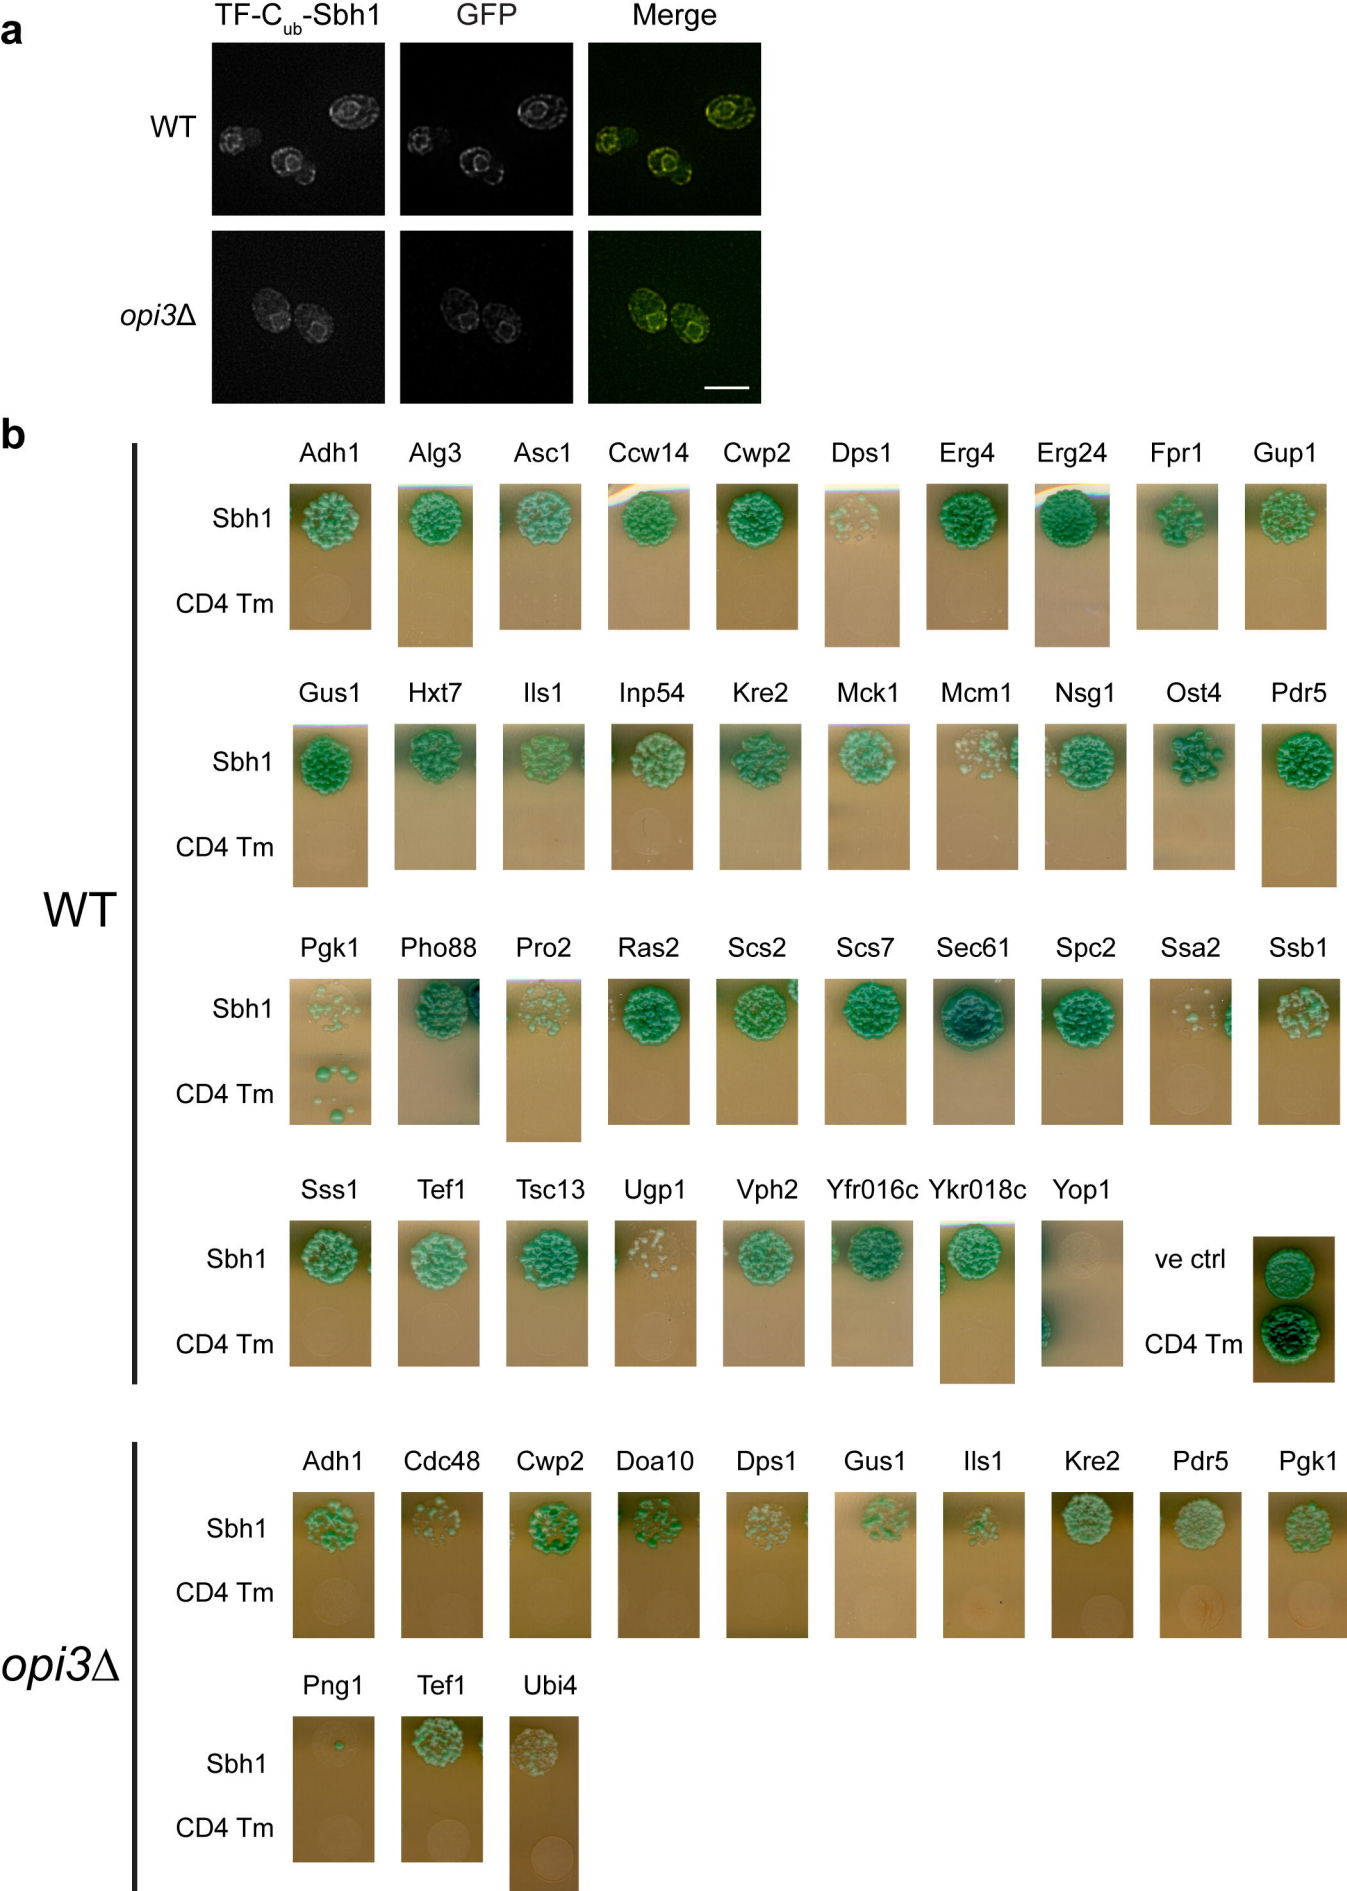

Figure S2

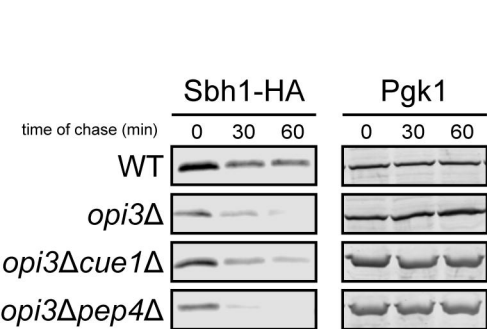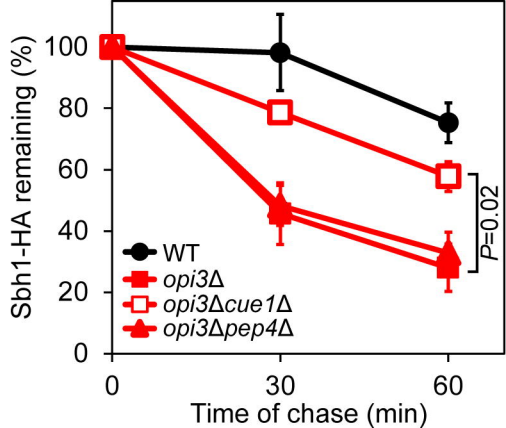

Figure S3
